1  
2  
3  
4  
5  
6  
7  
8  
9  
10  
11  
12  
13  
14  
15  
16  
17  
18  
19  
20  
21  
22

**A genetic toolkit for studying transposon control in the *Drosophila melanogaster* ovary**

Mostafa F. ElMaghraby<sup>1,2,3</sup>, Laszlo Tirian<sup>1,3</sup>, Kirsten-André Senti<sup>1</sup>, Katharina Meixner<sup>1</sup>, & Julius Brennecke<sup>1,4</sup>

<sup>1</sup> Institute of Molecular Biotechnology of the Austrian Academy of Sciences (IMBA), Vienna BioCenter (VBC), Dr. Bohr-Gasse 3, 1030 Vienna, Austria

<sup>2</sup> Vienna BioCenter PhD Program, Doctoral School at the University of Vienna and Medical University of Vienna, 1030 Vienna, Austria

<sup>3</sup> these authors contributed equally to this work

<sup>4</sup> correspondence: [julius.brennecke@imba.oeaw.ac.at](mailto:julius.brennecke@imba.oeaw.ac.at)

NGS Data on GEO: GSE174611

23 **Running Title: A genetic toolkit for studying transposon control**

24 Key words: Drosophila, ovary, Gal4, germline, piRNA pathway, transposons, RNAi

25

26 **Corresponding author:**

27 Dr. Julius Brennecke

28 Institute of Molecular Biotechnology

29 Dr. Bohr-Gasse 3

30 1030 Vienna, Austria

31 +43 1 790 44

32 [julius.brennecke@imba.oeaw.ac.at](mailto:julius.brennecke@imba.oeaw.ac.at)

33

34

35

36

37

38

39

40

41

42

43

44

45

46

47

48

49

50

51

52

53

54 **ABSTRACT**

55 Argonaute proteins of the PIWI class complexed with PIWI-interacting RNAs (piRNAs) protect the  
56 animal germline genome by silencing transposable elements. One of the leading experimental  
57 systems for studying piRNA biology is the *Drosophila melanogaster* ovary. In addition to classical  
58 mutagenesis, transgenic RNA interference (RNAi), which enables tissue-specific silencing of gene  
59 expression, plays a central role in piRNA research. Here, we establish a versatile toolkit focused on  
60 piRNA biology that combines germline transgenic RNAi, GFP marker lines for key proteins of the  
61 piRNA pathway, and reporter transgenes to establish genetic hierarchies. We compare constitutive,  
62 pan-germline RNAi with an equally potent transgenic RNAi system that is activated only after germ  
63 cell cyst formation. Stage-specific RNAi allows us to investigate the role of genes essential for  
64 germline cell survival, for example nuclear RNA export or the SUMOylation pathway, in piRNA-  
65 dependent and independent transposon silencing. Our work forms the basis for an expandable genetic  
66 toolkit provided by the Vienna Drosophila Resource Center.

## 67 INTRODUCTION

68 Transposable elements (TEs) are mobile, selfish genetic elements that have parasitized almost all  
69 eukaryotic genomes and pose a threat to genome integrity (FESCHOTTE 2008; FEDOROFF 2012). In  
70 plants, fungi, and animals, small RNA silencing pathways are centrally involved in TE silencing,  
71 indicating an ancient function of RNA interference pathways in protecting the genome (MALONE AND  
72 HANNON 2009). In the animal germline, genome defense guided by small RNAs is carried out by  
73 Argonaute proteins of the PIWI-clade and their bound PIWI-interacting RNAs (piRNAs) (SIOMI *et al.*  
74 *2011*; CZECH *et al.* 2018; OZATA *et al.* 2018). Most piRNAs originate from discrete genomic loci  
75 called piRNA clusters, which are rich in TE insertions (ARAVIN *et al.* 2007; BRENNECKE *et al.* 2007;  
76 HOUWING *et al.* 2007). Therefore, piRNAs can guide PIWI proteins to complementary TE transcripts,  
77 allowing their selective silencing at the transcriptional (nuclear PIWIs) and post transcriptional  
78 (cytoplasmic PIWIs) levels. Defects in the piRNA pathway are compatible with overall animal  
79 development but result in uncontrolled TE activity in gonads, DNA damage, ectopic recombination  
80 and sterility. As stable cell lines derived from germline cells are rare, and as the piRNA pathway can  
81 differ in different cell types, the arms race between TEs and the piRNA pathway must be studied  
82 within the context of a developing organism.

83  
84 *Drosophila* oogenesis is one of the leading model systems for piRNA research. Two main cell types  
85 make up the fly ovary: (1) germline cells (germline stem cells, dividing cystoblast cells, nurse cells  
86 and oocyte) and (2) somatic support cells that form the stem cell niche and surround, nourish, and  
87 protect the germline cells (HUDSON AND COOLEY 2014). Both, germline and somatic cells of the ovary  
88 harbor a functional piRNA pathway. However, these pathways differ in several aspects. For example,  
89 germline cells express three PIWI clade Argonautes (nuclear Piwi, cytoplasmic Aubergine and  
90 Ago3), whereas somatic cells of the ovary express only nuclear Piwi (MALONE *et al.* 2009). The  
91 identity and biology of the genomic piRNA source loci also differ in the two cell types. piRNA  
92 clusters in the ovarian soma resemble canonical RNA Polymerase II transcription units with defined  
93 promoter, transcription start site and termination site (LAU *et al.* 2009; MALONE *et al.* 2009; GORIAUX  
94 *et al.* 2014; MOHN *et al.* 2014). Germline piRNA clusters are instead specified at the chromatin level  
95 by the action of Rhino, a member of the heterochromatin protein 1 (HP1) family that recruits germline  
96 specific variants of core gene expression factors to enable enhancer-independent transcription on both  
97 DNA strands within heterochromatic loci (KLATTENHOFF *et al.* 2009; MOHN *et al.* 2014; ZHANG *et*

98 *al.* 2014; ANDERSEN *et al.* 2017). The resulting piRNA precursors are suppressed in splicing and  
99 canonical 3' end formation and are exported via a dedicated, germline specific RNA export route to  
100 the cytoplasmic, perinuclear piRNA processing sites known as nuage (CHEN *et al.* 2016;  
101 ELMAGHRABY *et al.* 2019; KNEUSS *et al.* 2019).

102  
103 Defects in the germline piRNA pathway result in uncontrolled TE transposition and persistent  
104 activation of the DNA damage checkpoint. As a result, oocyte patterning pathways are disrupted, and  
105 eggs laid by piRNA pathway mutant flies have dorso-ventral polarity defects (THEURKAUF *et al.*  
106 2006; KLATTENHOFF *et al.* 2007; SENTI *et al.* 2015; DURDEVIC *et al.* 2018; WANG *et al.* 2018). Based  
107 on this phenotype, classic genetic screens have uncovered several piRNA pathway genes  
108 (SCHUPBACH AND ROTH 1994; COOK *et al.* 2004; WEHR *et al.* 2006; CHEN *et al.* 2007; PANE *et al.*  
109 2007; ZAMPARINI *et al.* 2011). With the development of transgenic RNAi and the establishment of  
110 genome-wide *Drosophila* RNAi libraries (DIETZL *et al.* 2007; HALEY *et al.* 2008; NI *et al.* 2008; NI  
111 *et al.* 2011), reverse genetic screens have systematically revealed piRNA pathway genes (CZECH *et al.*  
112 2013; HANDLER *et al.* 2013). Depending on the Gal4 driver used, these screens were specific to  
113 the somatic or germline piRNA pathway. Together, they identified ~40 genes with specific functions  
114 in the piRNA pathway.

115  
116 Transgenic RNAi in the germline is based on *nanos*-Gal4 driver lines that activate the expression of  
117 long or short RNA hairpin constructs targeting a gene of interest. The two most powerful transgenic  
118 RNAi setups for the germline are: (1) Combining the Maternal Triple Driver (MTD-Gal4; a  
119 combination of COG-Gal4 on the X-chromosome, NGT-Gal4 on the second, and *nanos*-Gal4 on the  
120 third chromosome; (GRIEDER *et al.* 2000) with transgenes harboring short hairpins (shRNA;  
121 microRNA mimics) under UAS-control (Valium20/22 backbones from the Harvard TRiP collection)  
122 (NI *et al.* 2011). And (2), the combination of a dual *nanos*-Gal4 driver line that activates the  
123 expression of UAS-controlled long dsRNA hairpins from the Vienna RNAi collection and of the  
124 RNAi-boosting protein Dcr-2 (DIETZL *et al.* 2007; WANG AND ELGIN 2011). Both approaches result  
125 in potent silencing of target gene expression throughout oogenesis, from primordial germ cells to  
126 germline stem cells to nurse cells and mature oocytes.

127

128 While the pan-germline knockdown approaches have been instrumental for piRNA pathway research,  
129 they are not without limitations. For example, the piRNA pathway intersects with several general  
130 cellular processes such as SUMOylation, transcription, chromatin modification, and RNA export.  
131 Genetic disruption of these processes often leads to cell-lethal or pleiotropic phenotypes resulting in  
132 atrophic ovaries lacking germline cells, precluding meaningful analysis. Previous studies have  
133 identified and characterized alternative Gal4 driver lines that activate Gal4 expression in the female  
134 germline upon cystoblast differentiation (late germarium stages onward), leaving germline stem cells  
135 unaffected (STALLER *et al.* 2013). This allows genes with cell-essential functions to be studied as  
136 ovarian development proceeds to a sufficient extent.

137

138 Here, we first combine pan-oogenesis transgenic RNAi with marker lines expressing GFP-tagged  
139 piRNA pathway proteins with diverse molecular functions and sub-cellular localization. This toolkit  
140 provides a cell biology assay system for studying gene function within the germline piRNA pathway.  
141 We then introduce and characterize TOsk-Gal4, which causes strong Gal4 expression in the female  
142 germline immediately after germline cyst formation. TOsk-Gal4 is compatible with short and long  
143 hairpin RNAi libraries and allows efficient depletion of genes essential for cell survival without  
144 drastically affecting ovarian morphology and integrity. We combine TOsk-Gal4 with various genetic  
145 and molecular tools to study the interface between piRNA pathway, RNA export and protein  
146 SUMOylation.

## 147 **MATERIALS & METHODS**

### 148 **Fly Husbandry**

149 Flies were maintained at 25°C under light/dark cycles and 60% humidity. For ovary dissection, flies  
150 were kept in cages on apple juice plates with yeast paste for at least 5 days before dissection. All fly  
151 strains used and generated in this study are listed in Supplementary Table 1 and available via VDRC  
152 (<https://stockcenter.vdrc.at/control/main>).

153

### 154 **Generation of transgenic fly strains**

155 We generated fly strains harboring short hairpin RNA (shRNA) expression cassettes by cloning  
156 shRNA sequences into the Valium-20 vector (NI *et al.* 2011) modified with a white selection marker.  
157 Tagged fly strains were generated via insertion of desired tag sequences into locus-containing Pacman  
158 clones (VENKEN *et al.* 2009) via bacterial recombineering (EJSMONT *et al.* 2011).

159

### 160 **RNA Fluorescent In Situ Hybridization (RNA-FISH)**

161 5-10 ovary pairs were fixed in IF Fixing Buffer for 20 minutes at room temperature, washed three  
162 times for 10 minutes in PBX, and permeabilized in 70% ethanol at 4 °C overnight. Permeabilized  
163 ovaries were rehydrated in RNA-FISH wash buffer (10% (v/w) formamide in 2× SSC) for 10 minutes.  
164 Ovaries were resuspended in 50 µl hybridization buffer (10% (v/w) dextran sulfate, 10% (v/w)  
165 formamide in 2× SSC) supplemented with 0.5 µl of 25 µM RNA-FISH probe set solution (Stellaris;  
166 Supplementary Table 2 lists oligo sequences). Hybridization was performed at 37 °C overnight with  
167 rotation. Next, ovaries were washed twice with RNA-FISH wash buffer for 30 minutes at 37 °C, and  
168 twice with 2xSSC solution for 10 minutes at room temperature. To visualize DNA, DAPI (1:10,000  
169 dilution) was included in the first 2xSSC wash. Ovaries were mounted in ~40 µl Prolong Diamond  
170 mounting medium and imaged on a Zeiss LSM-880 confocal-microscope with AiryScan detector.

171

### 172 **Immunofluorescence staining of ovaries**

173 5-10 ovary pairs were dissected into ice-cold PBS and fixed in IF Fixing Buffer (4 % formaldehyde,  
174 0.3 % Triton X-100, 1x PBS) for 20 minutes at room temperature with rotation. Fixed ovaries were  
175 washed thrice with PBX (0.3 % Triton X-100, 1x PBS), 10 minutes each wash, and incubated in BBX  
176 (0.1% BSA, 0.3 % Triton X-100, 1x PBS) for 30 minutes for blocking. Primary antibodies diluted in  
177 BBX were added to ovaries and binding was performed at 4°C overnight. After three 10 minute-

178 washes in PBX, ovaries were incubated with secondary antibodies (1:1000 dilution in BBX) at 4°C  
179 overnight. Afterwards, the ovaries were washed 4 times with PBX, with the second wash done with  
180 DAPI (1:50,000 dilution). To visualize the nuclear envelope, Alexa Fluor 647-conjugated wheat germ  
181 agglutinin (1:200 dilution in PBX; Thermo Fisher Scientific) was added after DAPI staining for 20  
182 minutes. Ovaries were finally mounted in ~40 µl Prolong Diamond mounting medium and imaged  
183 on a Zeiss LSM-880 confocal-microscope with AiryScan detector. The resulting images processed  
184 using FIJI/ImageJ (SCHINDELIN *et al.* 2012). Supplementary Table 3 list antibodies used in this study.

185

### 186 **Western blot analysis**

187 10 ovary pairs were dissected in ice-cold PBS and homogenized with a plastic pestle in RIPA lysis  
188 buffer (50 mM Tris-HCl pH 7.5, 150 mM NaCl, 1% Triton X-100, 0.5% Na-deoxycholate, 0.1%  
189 SDS, 0.5 mM EGTA, 1 mM EDTA) freshly supplemented with 1mM Pefabloc, cOmplete Protease  
190 Inhibitor Cocktail (Roche), and 1 mM DTT. The samples were spun down at 14,000 rpm for 5  
191 minutes, and the homogenization step was repeated. After pooling both supernatants, samples were  
192 incubated on ice for 30 minutes and cleared by centrifugation at 14,000 rpm for 15 minutes. Protein  
193 concentrations were quantified by Bradford reagent, and 10 µg protein were resolved by SDS-  
194 polyacrylamide gel electrophoresis and transferred to a 0.2 µm nitrocellulose membrane (Bio-Rad).  
195 The membrane was blocked in 5% skimmed milk powder in PBX (0.01% Triton X-100 in PBS) and  
196 incubated with primary antibody overnight at 4°C (Supplementary Table 3). After three washes with  
197 PBX, the membrane was incubated with HRP-conjugated secondary antibody for 1h at room  
198 temperature, followed by three washes with PBX. Subsequently, the membrane was covered with  
199 Clarity Western ECL Blotting Substrate (Bio-Rad) and imaged using the ChemiDoc MP imaging  
200 system (Bio-Rad).

201

### 202 **RNA-Seq library preparation**

203 5 ovary pairs were homogenized with a plastic pestle in 200 µL TRIzol reagent, and after  
204 homogenization 800 µL TRIzol were added and incubated for 5 minutes at room temperature. 200  
205 µL chloroform–isoamyl-alcohol (24:1; Sigma Aldrich) were added, and after vigorous shaking,  
206 samples were incubated for 5 minutes at room temperature. Next, samples were centrifuged at 12,000  
207 g for 15 minutes at 4°C. RNA was transferred from the upper aqueous phase using the Direct-zol  
208 RNA Miniprep kit (Zymo Research) with in-column DNaseI treatment according to manufacturer's



209 instructions. rRNA depletion from 1 µg total RNA was performed as described previously  
210 (ElMaghraby et al., 2019). Libraries were then cloned using the NEBNext Ultra II Directional RNA  
211 Library Prep Kit for Illumina (NEB), following the recommended kit protocol and sequenced on a  
212 NovaSeq 6000 – SR100 (Illumina).

213

### 214 **RT-qPCR analysis of transposon expression**

215 Five pairs of dissected ovaries were homogenized in TRIzol reagent followed by RNA purification  
216 according to the manufacturer's protocol. RNA was further purified with Direct-zol MiniPrep kit  
217 (Zymo Research) with DNase I treatment. 1 µg of total RNA was reverse transcribed using the  
218 Maxima First Strand cDNA Synthesis kit (Thermo Fischer) following standard protocols. cDNA was  
219 used as template for RT-qPCR quantification of transposon mRNA abundances (for primer sequences  
220 see Supplementary Table 4).

221

### 222 **Data availability**

223 Table S1 list all fly stocks used and generated in the study. All fly stocks are available via the Vienna  
224 Drosophila Resource Center (VDRC). Next-Generation Sequencing data produced in this publication  
225 has been deposited to the NCBI GEO archive under the accession number GSE174611. Figure S1  
226 indicates a crossing scheme for generating Gal4-based reporter lines. Table S2 lists of Stellaris RNA-  
227 FISH probes used in this study. Table S2 and S3 list antibodies and oligo sequences used respectively.  
228 The authors affirm that all data necessary for confirming the conclusions of the article are present  
229 within the article, figures, and tables.

230

231

232

233

234

235

236

237

238

239

## 240 **RESULTS AND DISCUSSION**

### 241 **Combining pan-oogenesis RNAi with GFP-based piRNA pathway marker transgenes**

242 Approximately forty proteins act in the *Drosophila* piRNA pathway. These factors serve different  
243 molecular functions and are localized to distinct subcellular locations in the nucleus (e.g. nucleoplasm  
244 or genomic piRNA source loci) and/or in the cytoplasm (e.g. outer mitochondrial membrane,  
245 perinuclear nuage). To visualize piRNA pathway proteins in whole mount ovary preparations by  
246 confocal microscopy, we generated transgenic fly lines carrying genomic rescue constructs with a  
247 FLAG-GFP tag at the N- or C-terminus of key piRNA pathway factors (four examples shown in  
248 Figure 1A). GFP-tagging allows accurate and semi-quantitative determination of the subcellular  
249 localization of a protein as it circumvents the limitations of antigen accessibility to primary and  
250 secondary antibodies. This is particularly relevant in late stage egg chambers (Figure 1B) or for  
251 factors enriched in peri-nuclear nuage such as Nxf3, Bootlegger, or Nibbler (Figure 1C).

252

253 To be able to analyze the subcellular localization of the different piRNA pathway proteins in flies  
254 with targeted genetic perturbations (using transgenic RNAi), we combined the established GFP  
255 marker lines with germline specific Gal4 drivers. The resulting fly strains can be crossed with  
256 genome-wide collections of UAS lines that allow expression of long or short double stranded RNA  
257 constructs targeting any gene of interest (available from VDRC or Bloomington/TRiP). Figure S1  
258 shows the crossing schemes underlying the construction of MTD-Gal4 lines (compatible with short  
259 hairpin RNA (shRNA) UAS-lines) or *nanos*-Gal4 lines with a UAS-Dcr2 transgene (compatible with  
260 long hairpin RNA UAS-lines) harboring the various GFP reporter transgenes. The resulting stocks  
261 represent a core set of piRNA marker lines that can be crossed with available RNAi stocks and that  
262 are available from the VDRC (Table 1).

263

264 To illustrate the utility of the system, we focused on three subunits of the hexameric THO complex.  
265 THO is a key factor for nuclear mRNP quality control and, together with the RNA helicase UAP56  
266 and the adaptor protein Aly/Ref1, functions as a central gatekeeper for nuclear mRNP export (HEATH  
267 *et al.* 2016). In germline cells, THO binds piRNA precursors derived from heterochromatic piRNA  
268 clusters in addition to mRNAs (ZHANG *et al.* 2012; HUR *et al.* 2016; ZHANG *et al.* 2018). Based on  
269 its central role in nuclear mRNA export, THO is also thought to be required for the export of piRNA  
270 precursors. Consistent with this, THO localizes broadly in the nucleoplasm in all cells, but is

271 additionally enriched in germline cells at genomic piRNA source loci that are specified by the HP1  
272 family protein Rhino (HUR *et al.* 2016; ZHANG *et al.* 2018).

273

274 We generated MTD-Gal4 lines expressing GFP-tagged THO subunits Tho2, Thoc5, or Thoc7, and  
275 crossed them with UAS-shRNA lines targeting *rhino*, *thoc5* or *thoc7*. As expected, depletion of Rhino  
276 resulted in loss of Tho2, Thoc5, and Thoc7 accumulation in discrete nuclear foci, indicating that THO  
277 localization to piRNA clusters depends on Rhino (Figure 1D) (HUR *et al.* 2016; ZHANG *et al.* 2018).  
278 Loss of Thoc5 or Thoc7 revealed a strict co-dependence between both proteins for their stability,  
279 while Tho2 levels were only moderately affected in ovaries lacking Thoc5 or Thoc7 (Figures 1D-E).  
280 However, Tho2 localization to nuclear foci (piRNA clusters) strictly depended on Thoc5 and Thoc7  
281 (Figure 1D). Consistent with a critical role of THO at piRNA clusters, flies lacking Thoc5 or Thoc7  
282 in the germline, despite having morphologically normal ovaries, were sterile. Their sterility was  
283 presumably linked to defects in piRNA precursor export, supported by instability of Nxf3, the  
284 dedicated RNA export receptor for piRNA precursors (Figure 1F). In line with this, flies with strong  
285 hypomorphic *thoc5* or *thoc7* alleles are viable but show loss of piRNAs from Rhino-dependent  
286 clusters and are sterile (HUR *et al.* 2016; ZHANG *et al.* 2018). In contrast, depletion of Tho2 resulted  
287 in rudimentary ovaries, suggesting that Tho2 is genetically more important for mRNA export than  
288 the Thoc5 and Thoc7 subunits. These results are of interest in light of structural and biochemical  
289 studies of the human THO-UAP56 complex: Whereas Tho2 is part of the THO core assembly  
290 (alongside Hpr1 and Tex), Thoc5 and Thoc7 form an extended coiled coil that is responsible for  
291 dimerization of the hexameric THO complex (PUHRINGER *et al.* 2020). Our results illustrate that the  
292 combination of transgenic RNAi with GFP-transgenes is a powerful system to study protein function  
293 in the ovarian piRNA pathway and more generally during oogenesis.

294

295 A clear limitation of the pan-oogenesis Gal4 driver system is that genes, whose depletion is  
296 incompatible with oogenesis (e.g. *tho2*), cannot be studied. Transgenic RNAi of genes with cell-  
297 essential functions results in rudimentary ovaries lacking detectable germline cells. Numerous genes  
298 (e.g. those involved in heterochromatin establishment, SUMOylation, nuclear RNA export) that are  
299 required for a functional piRNA pathway can therefore not be studied in this manner. Inspired by  
300 previous studies (STALLER *et al.* 2013; YAN *et al.* 2014), we set out to characterize alternative

301 germline-specific Gal4 driver lines that, in combination with UAS-RNAi lines, are compatible with  
302 the analysis of cell-essential genes in the context of the ovarian piRNA pathway.

303

### 304 **Efficient and specific transgenic RNAi in the differentiating female germline**

305 Several germline specific genes are transcribed in differentiating cysts but not during embryonic,  
306 larval and pupal stages or in germline stem cells of the adult ovary. Gal4 driver lines exist for two of  
307 these genes: *oskar* (*osk*) and *alpha-Tubulin at 67C* (*αTub67C*) (Figure 2A) (BENTON AND ST  
308 JOHNSTON 2003; TELLEY *et al.* 2012). The *αTub67C*-Gal4 driver has been shown to induce efficient  
309 short-hairpin based RNAi in ovaries (STALLER *et al.* 2013; YAN *et al.* 2014). We set out to  
310 systematically compare *osk*-Gal4 and *αTub67C*-Gal4 to the pan-oogenesis MTD-Gal4. We first  
311 crossed each driver line with a fly line carrying a UASp-H2A-GFP transgene. In addition, we also  
312 induced H2A-GFP expression with *traffic jam* (*tj*)-Gal4, a somatic driver that is active in all somatic  
313 support cells of the ovary (TANENTZAPF *et al.* 2007; OLIVIERI *et al.* 2010). Western blot analysis  
314 indicated that H2A-GFP levels in ovary lysate were comparable (*osk*-Gal4) to, or even higher  
315 (*αTub67C*-Gal4), than those from the MTD-Gal4 crosses (Figure 2B). However, in contrast to the  
316 MTD-Gal4 crosses, no H2A-GFP was detectable in germline stem cells and early germline cysts in  
317 the germarium for the *osk*-Gal4 or *αTub67C*-Gal4 crosses (Figures 2A, C). We consistently observed  
318 that H2A-GFP expression initiated slightly earlier (germarium region 2b) for *osk*-Gal4 than for  
319 *αTub67C*-Gal4 (stage 2 egg chamber).

320

321 To evaluate the efficiency of the different drivers in inducing transgenic RNAi, we crossed them with  
322 flies carrying a very potent UAS-shRNA[GFP] transgene and one CRISPR-modified *piwi* allele  
323 harboring an N-terminal GFP-tag. As expected, MTD-Gal4 and *tj*-Gal4 induced strong depletion of  
324 GFP-Piwi in the entire ovarian germline or soma, respectively (Figure 2D). For *osk*-Gal4 and  
325 *αTub67C*-Gal4, GFP-Piwi levels were reduced from stage 2 egg chambers onwards and were  
326 undetectable in older egg chambers. As a more quantitative assay, we crossed the different Gal4  
327 drivers with a UAS-shRNA[*piwi*] line and determined female sterility. shRNA-mediated depletion of  
328 Piwi with MTD-Gal4 resulted in 100% sterility (n = 200 laid eggs). For *osk*-Gal4 or *αTub67C*-Gal4,  
329 we observed near-complete sterility with occasional escapers. A driver line combining *αTub67C*-  
330 Gal4 and *osk*-Gal4 on the second chromosome, henceforth designated as TOsk-Gal4, resulted in  
331 complete sterility and was therefore used throughout this study.

332 We compared TOsk-Gal4 and MTD-Gal4 in the context of the germline piRNA pathway and depleted  
333 the two central Argonaute proteins Piwi or Aubergine (Aub) with UAS-shRNA lines. Endogenous  
334 Piwi or Aub proteins were undetectable in all germline cells for MTD-Gal4 and from stage 2/3 egg  
335 chambers onwards for Tosk-Gal4 (shown for Aub in Figure 2E). For both Gal4 drivers, depletion of  
336 Piwi or Aub resulted in complete female sterility. To compare how depletion of Piwi with MTD-Gal4  
337 versus TOsk-Gal4 impacts TE silencing, the central function of the germline piRNA pathway in  
338 *Drosophila*, we conducted RNA-seq experiments and, for selected TEs, RNA fluorescent in situ  
339 hybridization (FISH) experiments on ovaries with the different knockdown conditions. Overall, the  
340 same TEs that were de-repressed in ovaries depleted for Piwi during the entirety of oogenesis (MTD-  
341 Gal4) were also de-repressed, albeit at lower levels, in ovaries where transgenic RNAi was effective  
342 only from stage 3 egg chambers onwards (TOsk-Gal4) (Figure 3A). Examples for TEs exhibiting  
343 similar de-repression behavior are *blood* or *HMS Beagle* (Figures 3B). Mid and late stage egg  
344 chambers (where loss of Piwi is indistinguishable in MTD- versus TOsk-Gal4 crosses) contribute the  
345 bulk of the ovary mass and RNA. We therefore argue that the milder TE de-repression in the TOsk-  
346 Gal4 crosses is not due to differences in knockdown efficiency, but rather due to delayed TE de-  
347 silencing upon loss of piRNA pathway activity. Piwi-mediated heterochromatin formation at TE loci  
348 likely contributes to this pattern. In agreement with this, steady state RNA levels for the LTR  
349 retrotransposon *mdg3*, which is primarily repressed via Piwi-mediated heterochromatin formation  
350 (SENTI *et al.* 2015) and whose steady state RNA levels were more than 350-fold elevated upon MTD-  
351 Gal4-mediated Piwi knockdown, did not change more than ~2-fold when Piwi was depleted with  
352 Tosk-Gal4 (Figures 2A, C). Taken together, TOsk-Gal4 allows potent transgenic RNAi in germline  
353 cells of maturing egg chambers. In the case of the piRNA pathway, this results in a temporal delay in  
354 TE de-repression compared to a pan-germline knockdown.

355

### 356 **Intersection points between piRNA pathway and essential cellular processes**

357 To evaluate the utility of the TOsk-Gal4 transgenic RNAi system, we investigated biological  
358 processes that are required for transposon silencing and for cellular viability. We focused on the  
359 nuclear RNA export factors UAP56 and Nxf1, the protein exporter Crm1 (ZHANG *et al.* 2012;  
360 ELMAGHRABY *et al.* 2019; KNEUSS *et al.* 2019), and on the protein SUMOylation machinery with the  
361 E1 activating enzyme Uba2–Aos1 and the E3 Ligase Su(var)2-10 (NINOVA *et al.* 2020). Depletion of  
362 any of these factors with MTD-Gal4 resulted in rudimentary ovaries, precluding any meaningful

363 analysis as these lacked germline tissue, evidenced by the absence of Aub expressing cells (Figures  
364 4, 5A; shown for UAP56, Crm1, Sbr). Crossing the same set of UAS-shRNA lines with the Tosk-  
365 Gal4 driver yielded flies with partially restored ovarian morphology and germline development.

366  
367 Nuclear export of mRNA and piRNA precursors, both transcribed by RNA Polymerase II, requires  
368 the THO complex and the RNA Helicase UAP56 (ZHANG *et al.* 2012; HUR *et al.* 2016; ZHANG *et al.*  
369 2018; ELMAGHRABY *et al.* 2019). Together, these proteins license the loading of the RNA cargo onto  
370 a specific nuclear export receptor belonging to the NXF protein family (Nxf1 for mRNA, Nxf3 for  
371 piRNA precursors), which subsequently shuttles its respective RNA cargo through nuclear pore  
372 complexes into the cytoplasm (KOHLENER AND HURT 2007; ELMAGHRABY *et al.* 2019; KNEUSS *et al.*  
373 2019). Consistent with their central role in nuclear mRNA export, RNAi-mediated depletion of Nxf1  
374 (*Drosophila* Small bristles; Sbr) or UAP56 with MTD-Gal4 resulted in ovaries lacking germline cells  
375 (absence of Aub expressing cells; Figure 5A). Depletion of UAP56 or Sbr with TOsk-Gal4 also  
376 yielded sterile females. These flies, however, contained larger ovaries with clearly developing egg  
377 chambers, hence permitting molecular analyses (Figures 4, 5A). We performed RNA-seq experiments  
378 on ovaries where UAP56 was depleted with TOsk-Gal4. Besides many genes that were de-regulated  
379 compared to control ovaries, numerous piRNA pathway repressed TEs were de-silenced (Figure 5B).  
380 In contrast, TEs were not de-repressed in ovaries depleted of the essential mRNA export receptor Sbr  
381 (Figure 5C) supporting a direct role of UAP56 in the piRNA pathway, beyond nuclear export of  
382 mRNAs encoding for piRNA pathway proteins. These findings highlight the dual role of UAP56 as  
383 a central gate keeper to feed RNA cargo into two distinct nuclear export receptors, Nxf1–Nxt1 for  
384 mRNAs and Nxf3–Nxt1 for Rhino dependent piRNA precursors.

385  
386 As a second intersection point between piRNA pathway and essential cellular processes, we chose  
387 piRNA-guided heterochromatin formation. The nuclear Argonaute protein Piwi, guided by its bound  
388 piRNAs, induces transcriptional gene silencing and specifies the local formation of heterochromatin  
389 at genomic TE insertions (WANG AND ELGIN 2011; SIENSKI *et al.* 2012; LE THOMAS *et al.* 2013;  
390 ROZHKOVA *et al.* 2013). This process depends on transcription of a piRNA-complementary nascent  
391 transcript. To mediate silencing, piRNA-loaded Piwi requires a handful of piRNA pathway-specific  
392 factors (Gtsf1/Asterix, Maelstrom, SFiNX complex) as well as factors of the general heterochromatin  
393 machinery that the piRNA pathway taps into (CZECH *et al.* 2018; NINOVA *et al.* 2019). Depletion of

394 these general factors via MTD-Gal4 driven transgenic RNAi yields rudimentary ovaries with absent  
395 germline tissue. To explore the utility of the TOsk-Gal4 system, we focused on the protein  
396 SUMOylation pathway that is involved in numerous chromatin-related processes and that is required  
397 for Piwi-mediated transcriptional silencing and heterochromatin formation (GAREAU AND LIMA 2010;  
398 JENTSCH AND PSAKHYE 2013; NINOVA *et al.* 2020).

399

400 Protein SUMOylation requires E1 and E2 enzymes. *Drosophila* expresses a single E1 enzyme (Aos1–  
401 Uba2) and a single E2 enzyme (Lwr), which in a stepwise manner transfer a SUMO moiety onto a  
402 target Lysin of the substrate. A handful of E3 ligases potentiate the SUMOylation process in a  
403 substrate specific manner. Recent work has uncovered a critical role for the E3 ligase Su(var)2-10,  
404 and hence SUMOylation, in Piwi-mediated heterochromatin formation (NINOVA *et al.* 2020).  
405 Depletion of Uba2, Aos1 or Su(var)2-10 with MTD-Gal4 was incompatible with GSC survival and  
406 oogenesis (Figure 4) (YAN *et al.* 2014). We therefore used TOsk-Gal4 driven transgenic RNAi to  
407 probe for a requirement for SUMOylation in the piRNA pathway. Piwi-mediated transcriptional  
408 silencing and heterochromatin formation can be mimicked by experimental tethering of the SFiNX  
409 complex to a nascent transcript using the  $\lambda$ N-boxB system (Figure 6A) (SIENSKI *et al.* 2015; YU *et*  
410 *al.* 2015). In ovaries from flies that ubiquitously express a GFP reporter with boxB sites and that  
411 harbor the TOsk-Gal4 driver and a UASp- $\lambda$ N-Panoramix (SFiNX subunit) construct, GFP expression  
412 was silenced specifically in the germline from stage 3 egg chambers onwards (Figure 4B).  
413 Simultaneous expression of shRNA constructs targeting Piwi, which acts upstream of SFiNX, had no  
414 impact on GFP silencing. Similarly, targeting the mRNA exporter Sbr (Nxf1) did not interfere with  
415 SFiNX function, supporting the specificity of the assay. In contrast, depletion of the SUMOylation  
416 machinery (Aos1, Uba2 or Su(var)2-10) restored GFP expression confirming that protein  
417 SUMOylation is required for SFiNX-mediated heterochromatin formation (Figure 6B).

418

419 To obtain a more quantitative and systematic impact of the SUMOylation pathway on TE silencing  
420 in the female germline, we performed RNA-seq experiments on ovaries depleted (via TOsk-Gal4) for  
421 Piwi, Uba2, Aos1 or Su(var)2-10 and compared TE RNA levels to those in control ovaries. Depletion  
422 of Piwi or Su(var)2-10 resulted in overall similar TE silencing defects (Figure 6C). When comparing  
423 TE transcript levels in Piwi depleted ovaries to those in ovaries depleted for the SUMO E1-ligase  
424 subunits Aos1 or Uba2, a similar set of TEs showed increased expression (Figure 6D). However, the

425 *R1* and *R2* retrotransposons, two LINE elements that integrate specifically into rDNA units, were  
426 strong outliers as they showed nearly exclusive de-repression in ovaries lacking *Aos1* or *Uba2*. In  
427 *Aos1* or *Uba2* depleted ovaries, steady state RNA levels of *R1* and *R2* reached enormous levels and  
428 were among the most abundant cellular transcripts (Figures 6D, E). *R1* or *R2* showed no de-repression  
429 in ovaries lacking *Piwi* (even when depleted via the MTD-Gal4 driver) although germline *Piwi* is  
430 loaded with *R1* and *R2* derived piRNAs. In agreement with a recent report (LUO *et al.* 2020), our data  
431 indicate that the SUMOylation pathway is integral for silencing *R1* and *R2*, likely in a piRNA-  
432 independent and to a large extent also in a Su(var)2-10 independent manner.

433

### 434 **A TOsk-Gal4 system for long dsRNA hairpins and earlier expression**

435 During our studies on the transgenic RNAi system using TOsk-Gal4, we encountered two technical  
436 aspects that warranted further modifications. While TOsk-Gal4 was highly efficient in depleting  
437 target genes using shRNA lines (e.g. TRIP collection), it was very inefficient with long dsRNA  
438 hairpin lines (VDRC collection). For example, when we crossed TOsk-Gal4 to UAS lines harboring  
439 long dsRNA hairpins targeting the SUMO-pathway, the resulting females were fertile, in stark  
440 contrast to crosses to shRNA lines targeting the same genes. This was reminiscent of the pan-  
441 oogenesis Gal4 driver system where efficient transgenic RNAi using long hairpin constructs requires  
442 the co-expression of the siRNA generating ribonuclease Dcr-2 (WANG AND ELGIN 2011). Indeed,  
443 when we combined TOsk-Gal4 with an X-chromosomal UAS-Dcr-2 transgene, knockdown of *Smt3*  
444 (*Drosophila* SUMO) as well as of the single E2 SUMO-conjugating enzyme *Ubc9* (encoded by the  
445 *lwr* gene) yielded sterile females. These exhibited severe reductions in *Smt3* levels specifically in the  
446 germline (for the *smt3* knockdown) and the characteristic strong de-repression of the *R1* and *R2*  
447 elements (Figure 6A, B). Given the almost genome wide collection of dsRNA hairpin lines at the  
448 VDRC, the TOsk-Gal4 > UAS-Dcr-2 combination stock will enable systematic genetic screens  
449 targeting genes that with a pan-oogenesis knockdown would yield rudimentary ovaries, often lacking  
450 germline tissue.

451

452 We finally considered the timing of oogenesis in respect to the onset of transgenic RNAi. The  
453 developmental process from germline stem cell division to mature egg takes nearly one week  
454 (HORNE-BADOVINAC AND BILDER 2005; HE *et al.* 2011). Up to four days are spent during the  
455 germarium stages, meaning before the onset of measurable depletion of target proteins using TOsk-



456 Gal4. Though extraordinary efficient in depleting even abundant factors like Piwi or Smt3, this means  
457 that the time window of efficient transgenic RNAi is around two to three days. To extend this effective  
458 knockdown period, we turned to the *bam*-Gal4 driver, which is expressed in a narrow time period of  
459 around one day at the onset of cystoblast division (Figure 7C) (CHEN AND MCKEARIN 2003). When  
460 combining *bam*-Gal4 with TOsk-Gal4 (BamTOsk-Gal4), the knockdown of GFP-Piwi with an  
461 shRNA line against GFP indicated severe loss of Piwi already at the germarium stage 2b, thereby  
462 extending the entire knockdown window of this triple driver to three to four days (Figure 7D). For a  
463 direct comparison of the various Gal4 driver combinations, we used the sh[*sbr*] line that leads to a  
464 highly potent depletion of the cell-essential mRNA export receptor Sbr (*Drosophila* Nxf1) (Figure  
465 7E). Depletion of Sbr with the pan-oogenesis MTD-Gal4 driver resulted in the complete absence of  
466 germline tissue (no Aub positive cells). Depletion by TOsk-Gal4 resulted in phenotypically normal  
467 germaria and two to four additional egg chambers per ovariole. The BamTOsk-Gal4 cross resulted in  
468 an intermediate phenotype with normal germaria but only one additional egg chamber per ovariole.  
469 Thus, the BamTOsk-Gal4 driver represents an ideal driver to study gene function in the differentiating  
470 female germline via transgenic RNAi.

471

472 Taken all together, our work provides a versatile, highly specific and powerful genetic toolkit that  
473 permits tissue specific RNAi at various stages of oogenesis in conjunction with GFP markers for the  
474 visualization of subcellular structures. While our focus was on piRNA biology, the presented  
475 approach is applicable to any expressed gene in the ovarian germline and complements previously  
476 established assays based on MTD-Gal4 or a double  *$\alpha$ Tub67C*-Gal4 driver (STALLER *et al.* 2013; YAN  
477 *et al.* 2014). Through the compatibility with genome wide short and long UAS-dsRNA lines available  
478 from the Bloomington stock center or the VDRC, our work enables reverse genetic screens for the  
479 involvement of cell-essential factors in specific biological processes.

480 **ACKNOWLEDGEMENTS**

481 We thank D. Handler and M. Gehre for help with bioinformatics and computational analyses, the  
482 IMBA/IMP/GMI core facilities, in particular BioOptics for support, the Vienna Biocenter Core  
483 Facilities (VBCF) for providing NGS, COVID-19 testing, and fly stocks and husbandry services  
484 (VDRC). Imre Gaspar and Daniel St. Johnston provided fly stocks. We sincerely thank Clemens  
485 Plaschka and Brennecke lab members for support and insightful discussions.

486

487 **FUNDING**

488 The Brennecke lab is supported by the Austrian Academy of Sciences, the European Research  
489 Council (ERC-2015-CoG - 682181), and the Austrian Science Fund (F 4303 and W1207). M.F.E is  
490 supported by a DOC Fellowship from the Austrian Academy of Sciences.

491

492 **AUTHOR CONTRIBUTIONS**

493 The project was conceived by JB, MFE and LT. MFE and LT performed all molecular biology and  
494 genetics experiments. KAS conceptualized the BamTosk-Gal4 driver and KAS and KM generated  
495 essential reagents and fly stocks. JB supervised the study and MFE, LT and JB wrote the paper with  
496 input from all authors.

497

498 **DECLARATION OF INTERESTS**

499 The authors declare no competing interests.

500 **FIGURE LEGENDS**

501 **Figure 1: Pan-oogenesis RNAi with GFP-based piRNA pathway marker transgenes**

502 (A) Confocal images (scale bars: 5  $\mu$ m) showing localization of GFP-tagged Zucchini (mitochondrial  
503 membrane), Deadlock (piRNA clusters), Aubergine (cytoplasm with nuage enrichment), and Piwi  
504 (nuclear) in germline nurse cell nuclei (nuclear envelope labelled with WGA in magenta).

505 (B) Confocal image (scale bar: 25  $\mu$ m) showing GFP-Piwi localization (green) in an ovariole stained  
506 also with anti-Piwi antibody (red). To the right, an enlarged early egg chamber with good overlap  
507 between GFP and immunofluorescence (IF) signals (top) and nurse cell nuclei from an older egg  
508 chamber where the GFP signal dominates due to reduced antibody penetration (bottom) are shown.

509 (C) Confocal image (scale bar: 3  $\mu$ m) showing a nurse cell nucleus expressing Bootlegger-GFP  
510 (green) from the endogenous locus stained with an anti-Bootlegger antibody (red). Overlap between  
511 GFP and IF signals is apparent in nuclear foci, yet very poor in nuage.

512 (D) Confocal images of egg chambers (scale bars: 25  $\mu$ m) displaying localization of GFP-tagged  
513 Thoc7, Thoc5, or Tho2 (greyscale) in the indicated germline knockdown (GLKD) conditions (nuclei  
514 highlighted in red are enlarged).

515 (E-F) Western blot analysis indicating levels of Thoc7 and Thoc5 (E), or Nxf3 (F) in ovary lysates  
516 from flies with indicated genotype (anti ATP-synthase blots served as loading control).

517  
518 **Figure 2: Efficient and specific transgenic RNAi in the differentiating female germline.**

519 (A) Cartoon of a *Drosophila* ovariole with somatic cells in green and germline cells in beige; egg  
520 chamber stages are indicated above and a magnified view of the germarium with stem cell niche is  
521 shown below.

522 (B) Western blot analysis indicating levels of H2A-GFP expressed with indicated Gal4 drivers (anti  
523 ATP-synthase blot served as loading control).

524 (C) Confocal images (scale bars: 50  $\mu$ m) showing ovarioles expressing H2A-GFP (greyscale) driven  
525 by indicated germline and soma Gal4 drivers (captions to the right show enlarged germaria).

526 (D) Confocal images (scale bars: 50  $\mu$ m) showing ovarioles expressing GFP-Piwi (greyscale) in the  
527 indicated genotypes (captions to the right show enlarged germaria).

528 (E) Top: Confocal images (scale bars: 50  $\mu$ m) showing ovarioles stained for Aubergine in the  
529 indicated genotypes (captions to the right show enlarged germaria). Bottom: Western blot analysis

530 indicating levels of endogenous Aubergine in ovarian lysates from flies with the indicated genotypes  
531 (anti ATP-synthase blot served as loading control).

532

### 533 **Figure 3: Comparison of MTD-Gal4 and TOsk-Gal4 driven transgenic RNAi**

534 (A) Scatter plot showing log<sub>2</sub> fold changes (relative to control) of TE steady state RNA levels in  
535 ovaries where germline Piwi was depleted using MTD-Gal4 or TOsk-Gal4.

536 (B and C) Confocal images (scale bars: 10 μm) of egg chambers with indicated genotype stained for  
537 the TEs *blood* or *HMS-Beagle* (B), or for *mdg3* (C) using RNA-FISH (yellow; DAPI: magenta).

538

### 539 **Figure 4: Transgenic RNAi of essential genes with TOsk-Gal4**

540 Bright field images (scale bar for all images: 200 μm) showing ovarian morphology from flies of the  
541 indicated genotype (to the left: MTD-Gal4 crosses; to the right: TOsk-Gal4 crosses).

542

### 543 **Figure 5: Dual role of UAP56 in mRNA export and transposon defense.**

544 (A) Confocal images (scale bars: 100 μm) showing whole ovaries from flies of indicated genotypes  
545 stained with anti-Aubergine antibody (red); DNA stained with DAPI (blue).

546 (B) Volcano plot showing fold changes in steady state mRNA (black dots) and TE transcript levels  
547 (red dots) in ovaries from TOsk-Gal4 > sh[UAP56] flies versus control flies (n = 2 biological  
548 replicates).

549 (C) qRT-PCR analysis showing fold changes in steady state TE transcript levels in ovaries from flies  
550 with indicated genotype qRT-PCR (n = 2 biological replicates; normalized to *rp49* mRNA levels).

551

### 552 **Figure 6: The SUMO machinery is required for TE repression in the germline**

553 (A) Cartoon depicting the transgenic RNA-tethering reporter based on the λN-boxB system. The α-  
554 tubulin promoter expresses GFP in all cells, and the 3' UTR harbors five boxB sites to allow tethering  
555 of λN-Panx to the reporter mRNA.

556 (B) Confocal images (scale bar: 50 μm) showing GFP signal (greyscale) in egg chambers expressing  
557 the GFP-boxB reporter plus λN-Panx and the indicated shRNAs specifically in the germline using  
558 TOsk-Gal4 (somatic cells serve as control).

559 (C-D) Scatter plots based on RNA-seq data showing log<sub>2</sub> fold changes (relative to control) in TE  
560 steady state transcript levels in ovaries from flies of the indicated genotype.

561 (E) Confocal images (scale bar: 10  $\mu\text{m}$ ) of egg chambers from flies with indicated genotype showing  
562 *RI* transposon mRNA using RNA-FISH (yellow; DAPI: magenta).

563

564 **Figure 7: Extensions of the TOsk-Gal4 system**

565 (A) Confocal images (scale bar: 10  $\mu\text{m}$ ) showing ovarioles from flies with indicated genotype stained  
566 with anti-Smt3 antibody (greyscale).

567 (B) Confocal images (scale bar: 10  $\mu\text{m}$ ) of egg chambers from flies with indicated genotype showing  
568 *RI* transcripts (RNA-FISH: yellow, DAPI: magenta).

569 (C) Confocal image showing ovarioles expressing H2A-GFP driven by the *bam*-Gal4 driver.

570 (D) Confocal image (scale bar: 25  $\mu\text{m}$ ) showing GFP-Piwi levels (greyscale) in an ovariole expressing  
571 an sh[GFP] transgene with BamTOsk-Gal4 (inset shows the enlarger germarium; somatic cells serve  
572 as internal control).

573 (D) Confocal images showing whole ovaries (top row; scale bar: 100  $\mu\text{m}$ ) from flies of indicated  
574 genotype stained with anti-Aubergine antibody (red); DNA stained with DAPI (blue). Early  
575 oogenesis regions are highlighted in the bottom row (scale bar: 25  $\mu\text{m}$ ).

576 **Figure S1: Crossing scheme to generate marker lines with Gal4 Drivers.**

577 (A) Scheme for construction of MTD-Gal4 lines with compatible with short hairpin RNA (shRNA)  
578 UAS-lines.

579 (B) Scheme for construction of nanos-Gal4 lines with a UAS-Dcr-2 transgene compatible with long  
580 hairpin RNA UAS-lines.

581

582

583 **REFERENCES**

- 584 Andersen, P. R., L. Tirian, M. Vunjak and J. Brennecke, 2017 A heterochromatin-dependent  
585 transcription machinery drives piRNA expression. *Nature* 549: 54-59.
- 586 Aravin, A. A., R. Sachidanandam, A. Girard, K. Fejes-Toth and G. J. Hannon, 2007  
587 Developmentally regulated piRNA clusters implicate MILI in transposon control. *Science*  
588 316: 744-747.
- 589 Benton, R., and D. St Johnston, 2003 *Drosophila* PAR-1 and 14-3-3 inhibit Bazooka/PAR-3 to  
590 establish complementary cortical domains in polarized cells. *Cell* 115: 691-704.
- 591 Brennecke, J., A. A. Aravin, A. Stark, M. Dus, M. Kellis *et al.*, 2007 Discrete Small RNA-  
592 Generating Loci as Master Regulators of Transposon Activity in *Drosophila*. *Cell* 128:  
593 1089-1103.
- 594 Chen, D., and D. M. McKearin, 2003 A discrete transcriptional silencer in the *bam* gene determines  
595 asymmetric division of the *Drosophila* germline stem cell. *Development* 130: 1159-1170.
- 596 Chen, Y., A. Pane and T. Schupbach, 2007 Cutoff and aubergine mutations result in retrotransposon  
597 upregulation and checkpoint activation in *Drosophila*. *Curr Biol* 17: 637-642.
- 598 Chen, Y. A., E. Stuwe, Y. Luo, M. Ninova, A. Le Thomas *et al.*, 2016 Cutoff Suppresses RNA  
599 Polymerase II Termination to Ensure Expression of piRNA Precursors. *Mol Cell* 63: 97-  
600 109.
- 601 Cook, H. A., B. S. Koppetsch, J. Wu and W. E. Theurkauf, 2004 The *Drosophila* SDE3 homolog  
602 armitage is required for oskar mRNA silencing and embryonic axis specification. *Cell* 116:  
603 817-829.
- 604 Czech, B., M. Munafo, F. Ciabrelli, E. L. Eastwood, M. H. Fabry *et al.*, 2018 piRNA-Guided  
605 Genome Defense: From Biogenesis to Silencing. *Annu Rev Genet* 52: 131-157.
- 606 Czech, B., J. B. Preall, J. McGinn and G. J. Hannon, 2013 A Transcriptome-wide RNAi Screen in  
607 the *Drosophila* Ovary Reveals Factors of the Germline piRNA Pathway. *Mol Cell* 50: 749-  
608 761.
- 609 Dietzl, G., D. Chen, F. Schnorrer, K. C. Su, Y. Barinova *et al.*, 2007 A genome-wide transgenic  
610 RNAi library for conditional gene inactivation in *Drosophila*. *Nature* 448: 151-156.
- 611 Durdevic, Z., R. S. Pillai and A. Ephrussi, 2018 Transposon silencing in the *Drosophila* female  
612 germline is essential for genome stability in progeny embryos. *Life Sci Alliance* 1:  
613 e201800179.

- 614 Ejsmont, R. K., M. Bogdanzaliewa, K. A. Lipinski and P. Tomancak, 2011 Production of fosmid  
615 genomic libraries optimized for liquid culture recombineering and cross-species  
616 transgenesis. *Methods Mol Biol* 772: 423-443.
- 617 ELMaghraby, M. F., P. R. Andersen, F. Puhlinger, U. Hohmann, K. Meixner *et al.*, 2019 A  
618 Heterochromatin-Specific RNA Export Pathway Facilitates piRNA Production. *Cell* 178:  
619 964-979 e920.
- 620 Fedoroff, N. V., 2012 Presidential address. Transposable elements, epigenetics, and genome  
621 evolution. *Science* 338: 758-767.
- 622 Feschotte, C., 2008 Transposable elements and the evolution of regulatory networks. *Nat Rev Genet*  
623 9: 397-405.
- 624 Gareau, J. R., and C. D. Lima, 2010 The SUMO pathway: emerging mechanisms that shape  
625 specificity, conjugation and recognition. *Nat Rev Mol Cell Biol* 11: 861-871.
- 626 Goriaux, C., S. Desset, Y. Renaud, C. Vaury and E. Brasset, 2014 Transcriptional properties and  
627 splicing of the flamenco piRNA cluster. *EMBO Rep* 15: 411-418.
- 628 Grieder, N. C., M. de Cuevas and A. C. Spradling, 2000 The fusome organizes the microtubule  
629 network during oocyte differentiation in *Drosophila*. *Development* 127: 4253-4264.
- 630 Haley, B., D. Hendrix, V. Trang and M. Levine, 2008 A simplified miRNA-based gene silencing  
631 method for *Drosophila melanogaster*. *Dev Biol* 321: 482-490.
- 632 Handler, D., K. Meixner, M. Pizka, K. Lauss, C. Schmied *et al.*, 2013 The Genetic Makeup of the  
633 *Drosophila* piRNA Pathway. *Mol Cell* 50: 762-777.
- 634 Hayashi, R., J. Schnabl, D. Handler, F. Mohn, S. L. Ameres *et al.*, 2016 Genetic and mechanistic  
635 diversity of piRNA 3'-end formation. *Nature* 539: 588-592.
- 636 He, L., X. Wang and D. J. Montell, 2011 Shining light on *Drosophila* oogenesis: live imaging of  
637 egg development. *Curr Opin Genet Dev* 21: 612-619.
- 638 Heath, C. G., N. Viphakone and S. A. Wilson, 2016 The role of TREX in gene expression and  
639 disease. *Biochem J* 473: 2911-2935.
- 640 Horne-Badovinac, S., and D. Bilder, 2005 Mass transit: epithelial morphogenesis in the *Drosophila*  
641 egg chamber. *Dev Dyn* 232: 559-574.
- 642 Houwing, S., L. M. Kamminga, E. Berezikov, D. Cronembold, A. Girard *et al.*, 2007 A role for  
643 Piwi and piRNAs in germ cell maintenance and transposon silencing in Zebrafish. *Cell* 129:  
644 69-82.

- 645 Hudson, A. M., and L. Cooley, 2014 Methods for studying oogenesis. *Methods* 68: 207-217.
- 646 Hur, J. K., Y. Luo, S. Moon, M. Ninova, G. K. Marinov *et al.*, 2016 Splicing-independent loading  
647 of TREX on nascent RNA is required for efficient expression of dual-strand piRNA clusters  
648 in *Drosophila*. *Genes Dev* 30: 840-855.
- 649 Jentsch, S., and I. Psakhye, 2013 Control of nuclear activities by substrate-selective and protein-  
650 group SUMOylation. *Annu Rev Genet* 47: 167-186.
- 651 Klattenhoff, C., D. P. Bratu, N. McGinnis-Schultz, B. S. Koppetsch, H. A. Cook *et al.*, 2007  
652 *Drosophila* rasiRNA pathway mutations disrupt embryonic axis specification through  
653 activation of an ATR/Chk2 DNA damage response. *Dev Cell* 12: 45-55.
- 654 Klattenhoff, C., H. Xi, C. Li, S. Lee, J. Xu *et al.*, 2009 The *Drosophila* HP1 homolog Rhino is  
655 required for transposon silencing and piRNA production by dual-strand clusters. *Cell* 138:  
656 1137-1149.
- 657 Kneuss, E., M. Munafo, E. L. Eastwood, U. S. Deumer, J. B. Preall *et al.*, 2019 Specialization of the  
658 *Drosophila* nuclear export family protein Nxf3 for piRNA precursor export. *Genes Dev* 33:  
659 1208-1220.
- 660 Kohler, A., and E. Hurt, 2007 Exporting RNA from the nucleus to the cytoplasm. *Nat Rev Mol Cell*  
661 *Biol* 8: 761-773.
- 662 Lau, N. C., N. Robine, R. Martin, W. J. Chung, Y. Niki *et al.*, 2009 Abundant primary piRNAs,  
663 endo-siRNAs, and microRNAs in a *Drosophila* ovary cell line. *Genome Res*.
- 664 Le Thomas, A., A. K. Rogers, A. Webster, G. K. Marinov, S. E. Liao *et al.*, 2013 Piwi induces  
665 piRNA-guided transcriptional silencing and establishment of a repressive chromatin state.  
666 *Genes Dev* 27: 390-399.
- 667 Luo, Y., E. Fefelova, M. Ninova, Y. A. Chen and A. A. Aravin, 2020 Repression of interrupted and  
668 intact rDNA by the SUMO pathway in *Drosophila melanogaster*. *Elife* 9.
- 669 Malone, C. D., J. Brennecke, M. Dus, A. Stark, W. R. McCombie *et al.*, 2009 Specialized piRNA  
670 pathways act in germline and somatic tissues of the *Drosophila* ovary. *Cell* 137: 522-535.
- 671 Malone, C. D., and G. J. Hannon, 2009 Small RNAs as guardians of the genome. *Cell* 136: 656-  
672 668.
- 673 Mohn, F., G. Sienski, D. Handler and J. Brennecke, 2014 The rhino-deadlock-cutoff complex  
674 licenses noncanonical transcription of dual-strand piRNA clusters in *Drosophila*. *Cell* 157:  
675 1364-1379.



- 676 Ni, J. Q., M. Markstein, R. Binari, B. Pfeiffer, L. P. Liu *et al.*, 2008 Vector and parameters for  
677 targeted transgenic RNA interference in *Drosophila melanogaster*. *Nat Methods* 5: 49-51.
- 678 Ni, J. Q., R. Zhou, B. Czech, L. P. Liu, L. Holderbaum *et al.*, 2011 A genome-scale shRNA  
679 resource for transgenic RNAi in *Drosophila*. *Nat Methods* 8: 405-407.
- 680 Ninova, M., Y. A. Chen, B. Godneeva, A. K. Rogers, Y. Luo *et al.*, 2020 Su(var)2-10 and the  
681 SUMO Pathway Link piRNA-Guided Target Recognition to Chromatin Silencing. *Mol Cell*  
682 77: 556-570 e556.
- 683 Ninova, M., K. Fejes Toth and A. A. Aravin, 2019 The control of gene expression and cell identity  
684 by H3K9 trimethylation. *Development* 146.
- 685 Olivieri, D., M. M. Sykora, R. Sachidanandam, K. Mechtler and J. Brennecke, 2010 An in vivo  
686 RNAi assay identifies major genetic and cellular requirements for primary piRNA  
687 biogenesis in *Drosophila*. *EMBO J* 29: 3301-3317.
- 688 Ozata, D. M., I. Gainetdinov, A. Zoch, D. O'Carroll and P. D. Zamore, 2018 PIWI-interacting  
689 RNAs: small RNAs with big functions. *Nat Rev Genet*.
- 690 Pane, A., K. Wehr and T. Schupbach, 2007 zucchini and squash encode two putative nucleases  
691 required for rasiRNA production in the *Drosophila* germline. *Dev Cell* 12: 851-862.
- 692 Puhringer, T., U. Hohmann, L. Fin, B. Pacheco-Fiallos, U. Schellhaas *et al.*, 2020 Structure of the  
693 human core transcription-export complex reveals a hub for multivalent interactions. *Elife* 9.
- 694 Rozhkov, N. V., M. Hammell and G. J. Hannon, 2013 Multiple roles for Piwi in silencing  
695 *Drosophila* transposons. *Genes Dev* 27: 400-412.
- 696 Schindelin, J., I. Arganda-Carreras, E. Frise, V. Kaynig, M. Longair *et al.*, 2012 Fiji: an open-  
697 source platform for biological-image analysis. *Nat Methods* 9: 676-682.
- 698 Schupbach, T., and S. Roth, 1994 Dorsoventral patterning in *Drosophila* oogenesis. *Curr Opin*  
699 *Genet Dev* 4: 502-507.
- 700 Senti, K. A., D. Jurczak, R. Sachidanandam and J. Brennecke, 2015 piRNA-guided slicing of  
701 transposon transcripts enforces their transcriptional silencing via specifying the nuclear  
702 piRNA repertoire. *Genes Dev* 29: 1747-1762.
- 703 Sienski, G., J. Batki, K. A. Senti, D. Donertas, L. Tirian *et al.*, 2015 Silencio/CG9754 connects the  
704 Piwi-piRNA complex to the cellular heterochromatin machinery. *Genes Dev* 29: 2258-2271.
- 705 Sienski, G., D. Donertas and J. Brennecke, 2012 Transcriptional silencing of transposons by Piwi  
706 and maelstrom and its impact on chromatin state and gene expression. *Cell* 151: 964-980.

- 707 Siomi, M. C., K. Sato, D. Pezic and A. A. Aravin, 2011 PIWI-interacting small RNAs: the  
708 vanguard of genome defence. *Nat Rev Mol Cell Biol* 12: 246-258.
- 709 Staller, M. V., D. Yan, S. Randklev, M. D. Bragdon, Z. B. Wunderlich *et al.*, 2013 Depleting gene  
710 activities in early *Drosophila* embryos with the "maternal-Gal4-shRNA" system. *Genetics*  
711 193: 51-61.
- 712 Tanentzapf, G., D. Devenport, D. Godt and N. H. Brown, 2007 Integrin-dependent anchoring of a  
713 stem-cell niche. *Nat Cell Biol* 9: 1413-1418.
- 714 Telley, I. A., I. Gaspar, A. Ephrussi and T. Surrey, 2012 Aster migration determines the length scale  
715 of nuclear separation in the *Drosophila* syncytial embryo. *J Cell Biol* 197: 887-895.
- 716 Theurkauf, W. E., C. Klattenhoff, D. P. Bratu, N. McGinnis-Schultz, B. S. Koppetsch *et al.*, 2006  
717 rasiRNAs, DNA damage, and embryonic axis specification. *Cold Spring Harb Symp Quant*  
718 *Biol* 71: 171-180.
- 719 Venken, K. J., J. W. Carlson, K. L. Schulze, H. Pan, Y. He *et al.*, 2009 Versatile P[acman] BAC  
720 libraries for transgenesis studies in *Drosophila melanogaster*. *Nat Methods* 6: 431-434.
- 721 Wang, L., K. Dou, S. Moon, F. J. Tan and Z. Z. Zhang, 2018 Hijacking Oogenesis Enables Massive  
722 Propagation of LINE and Retroviral Transposons. *Cell* 174: 1082-1094 e1012.
- 723 Wang, S. H., and S. C. Elgin, 2011 *Drosophila* Piwi functions downstream of piRNA production  
724 mediating a chromatin-based transposon silencing mechanism in female germ line. *Proc*  
725 *Natl Acad Sci U S A* 108: 21164-21169.
- 726 Wehr, K., A. Swan and T. Schupbach, 2006 Deadlock, a novel protein of *Drosophila*, is required for  
727 germline maintenance, fusome morphogenesis and axial patterning in oogenesis and  
728 associates with centrosomes in the early embryo. *Dev Biol* 294: 406-417.
- 729 Yan, D., R. A. Neumuller, M. Buckner, K. Ayers, H. Li *et al.*, 2014 A regulatory network of  
730 *Drosophila* germline stem cell self-renewal. *Dev Cell* 28: 459-473.
- 731 Yu, Y., J. Gu, Y. Jin, Y. Luo, J. B. Preall *et al.*, 2015 Panoramix enforces piRNA-dependent  
732 cotranscriptional silencing. *Science* 350: 339-342.
- 733 Zamparini, A. L., M. Y. Davis, C. D. Malone, E. Vieira, J. Zavadil *et al.*, 2011 Vreteno, a gonad-  
734 specific protein, is essential for germline development and primary piRNA biogenesis in  
735 *Drosophila*. *Development* 138: 4039-4050.
- 736 Zhang, F., J. Wang, J. Xu, Z. Zhang, B. S. Koppetsch *et al.*, 2012 UAP56 couples piRNA clusters  
737 to the perinuclear transposon silencing machinery. *Cell* 151: 871-884.

- 738 Zhang, G., S. Tu, T. Yu, X. O. Zhang, S. S. Parhad *et al.*, 2018 Co-dependent Assembly of  
739 *Drosophila* piRNA Precursor Complexes and piRNA Cluster Heterochromatin. *Cell Rep* 24:  
740 3413-3422 e3414.
- 741 Zhang, Z., J. Wang, N. Schultz, F. Zhang, S. S. Parhad *et al.*, 2014 The HP1 homolog rhino anchors  
742 a nuclear complex that suppresses piRNA precursor splicing. *Cell* 157: 1353-1363.  
743

**Table 1. MTD-Gal4 reporter lines**

|                                              | Name                          | Gene name         | CG Number | Source                          |
|----------------------------------------------|-------------------------------|-------------------|-----------|---------------------------------|
| THO/TREX                                     | MTD-Gal4 + Thoc5-GFP          | <i>thoc5</i>      | CG2980    | This paper                      |
|                                              | MTD-Gal4 + GFP-Thoc7          | <i>thoc7</i>      | CG17143   | This paper                      |
|                                              | MTD-Gal4 + GFP-Tho2           | <i>Tho2</i>       | CG31671   | This paper                      |
|                                              | MTD-Gal4 + GFP-UAP56          | <i>Hel25E</i>     | CG7269    | EIMaghraby <i>et al.</i> , 2019 |
| piRNA cluster biology                        | MTD-Gal4 + GFP-Rhino          | <i>rhi</i>        | CG10683   | Mohn <i>et al.</i> , 2014       |
|                                              | MTD-Gal4 + GFP-Deadlock       | <i>cuff</i>       | CG13190   | Mohn <i>et al.</i> , 2014       |
|                                              | MTD-Gal4 + GFP-Cutoff         | <i>del</i>        | CG9252    | Mohn <i>et al.</i> , 2014       |
|                                              | MTD-Gal4 + GFP-Moonshiner     | <i>moon</i>       | CG12721   | EIMaghraby <i>et al.</i> , 2019 |
|                                              | MTD-Gal4 + GFP-Nxf3           | <i>nxf3</i>       | CG32135   | EIMaghraby <i>et al.</i> , 2019 |
|                                              | MTD-Gal4 + GFP-Bootlegger     | <i>boot</i>       | CG13741   | EIMaghraby <i>et al.</i> , 2019 |
| piRNA biogenesis                             | MTD-Gal4 + GFP-Zucchini       | <i>zuc</i>        | CG12314   | Hayashi <i>et al.</i> , 2016    |
|                                              | MTD-Gal4 + GFP-Gasz           | <i>Gasz</i>       | CG2183    | This paper                      |
|                                              | MTD-Gal4 + GFP-Vasa           | <i>vas</i>        | CG46283   | This paper                      |
|                                              | MTD-Gal4 + GFP-Aubergine      | <i>spn-E</i>      | CG3158    | This paper                      |
|                                              | MTD-Gal4 + GFP-Spindle E      | <i>aub</i>        | CG6137    | This paper                      |
|                                              | MTD-Gal4 + GFP-Nibbler        | <i>Nbr</i>        | CG9247    | This paper                      |
| piRNA-mediated silencing and heterochromatin | MTD-Gal4 + GFP-Nxf2           | <i>nxf2</i>       | CG4118    | This paper                      |
|                                              | MTD-Gal4 + GFP-Gtsf1          | <i>arx</i>        | CG3893    | This paper                      |
|                                              | MTD-Gal4 + GFP-Panoramix      | <i>Panx</i>       | CG9754    | This paper                      |
|                                              | MTD-Gal4 + GFP-Piwi           | <i>piwi</i>       | CG6122    | This paper                      |
|                                              | MTD-Gal4 + GFP-Sov            | <i>sov</i>        | CG14438   | This paper                      |
|                                              | MTD-Gal4 + GFP-HP1            | <i>Su(var)3-9</i> | CG43664   | This paper                      |
|                                              | MTD-Gal4 + GFP-Eggless        | <i>egg</i>        | CG12196   | This paper                      |
|                                              | MTD-Gal4 + silencing reporter |                   |           | Sienski <i>et al.</i> , 2015    |



## Figure 1

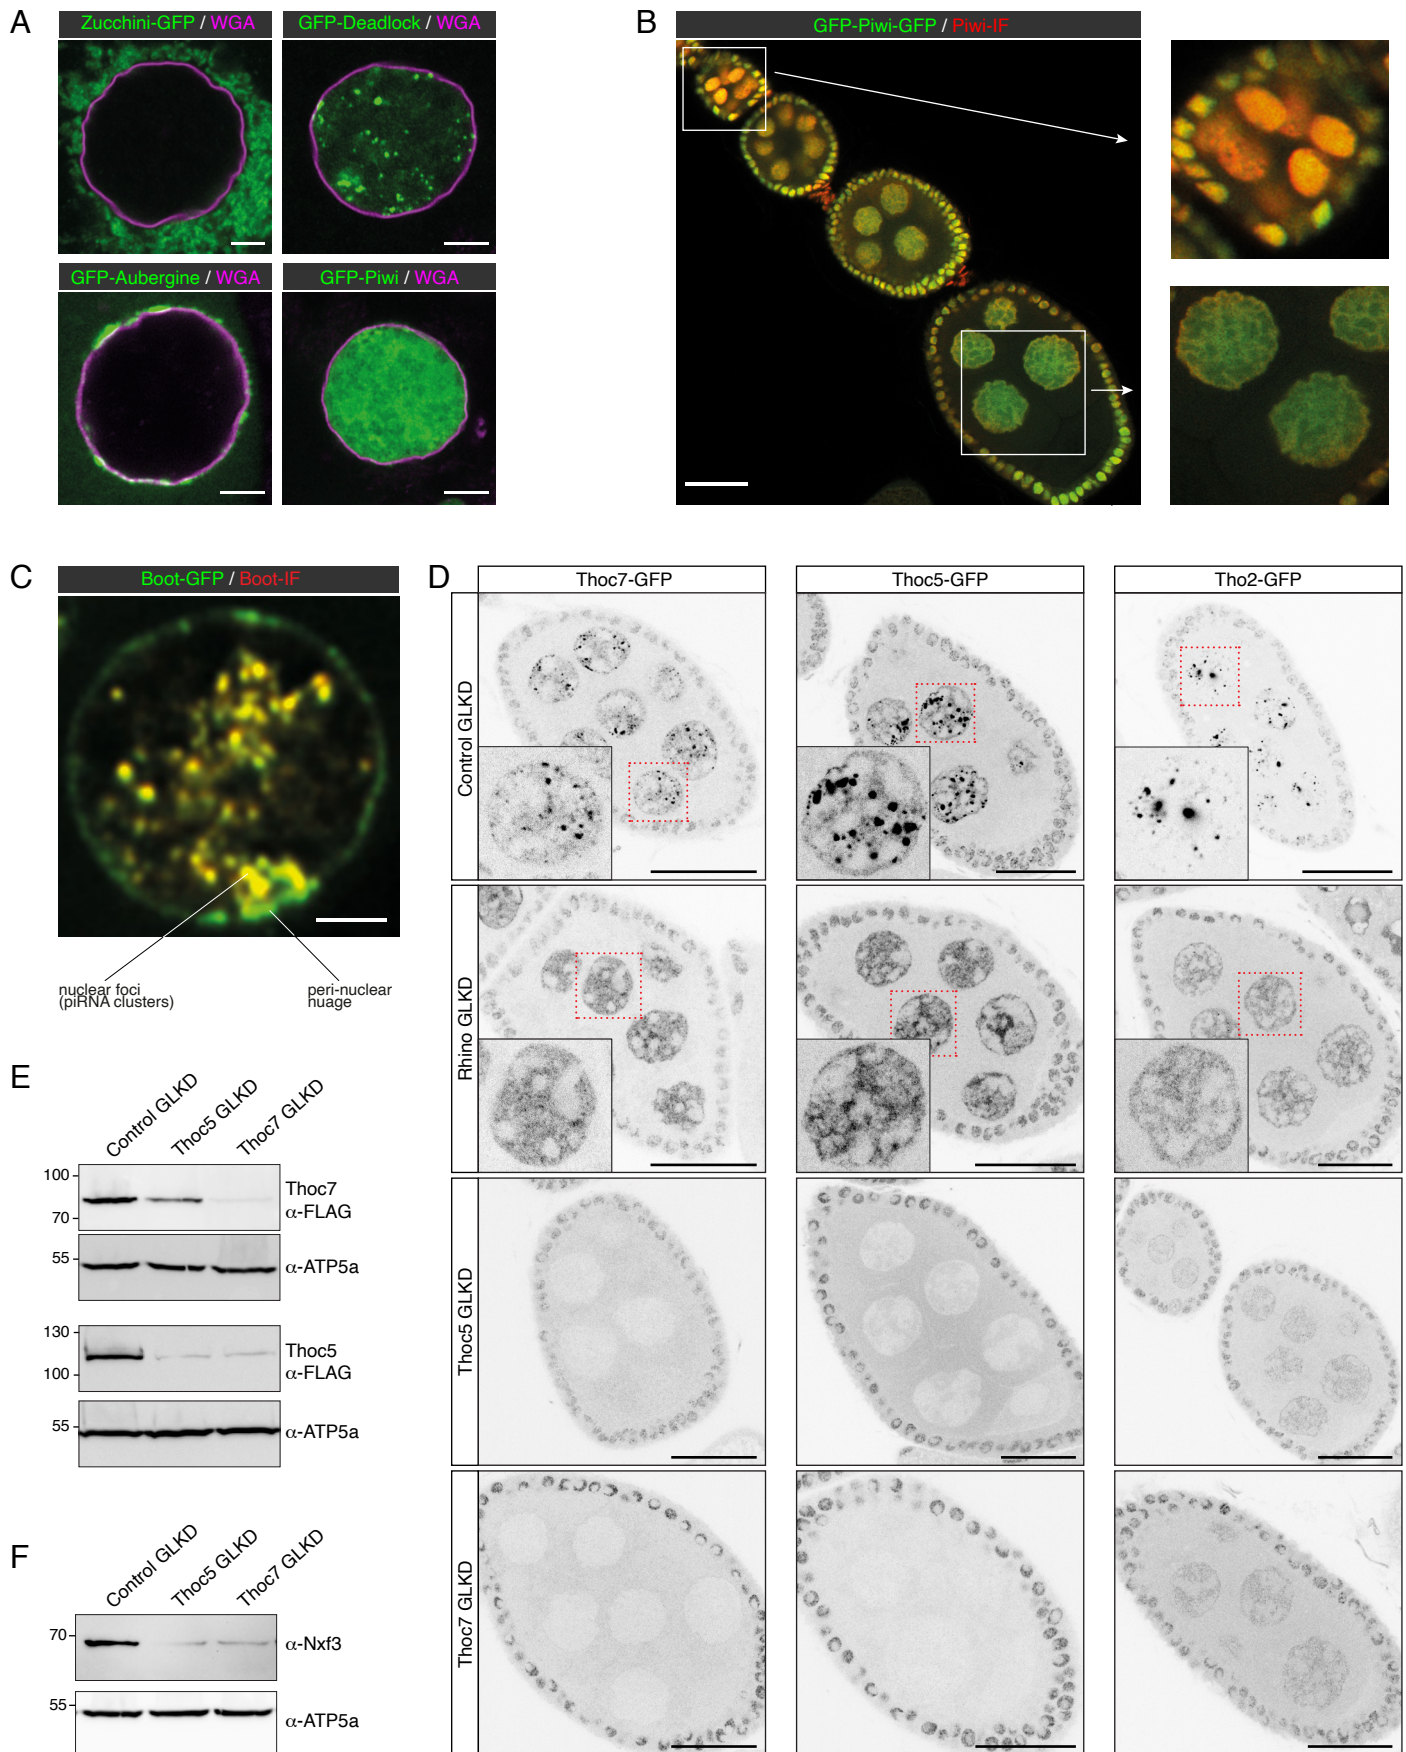

## Figure 2

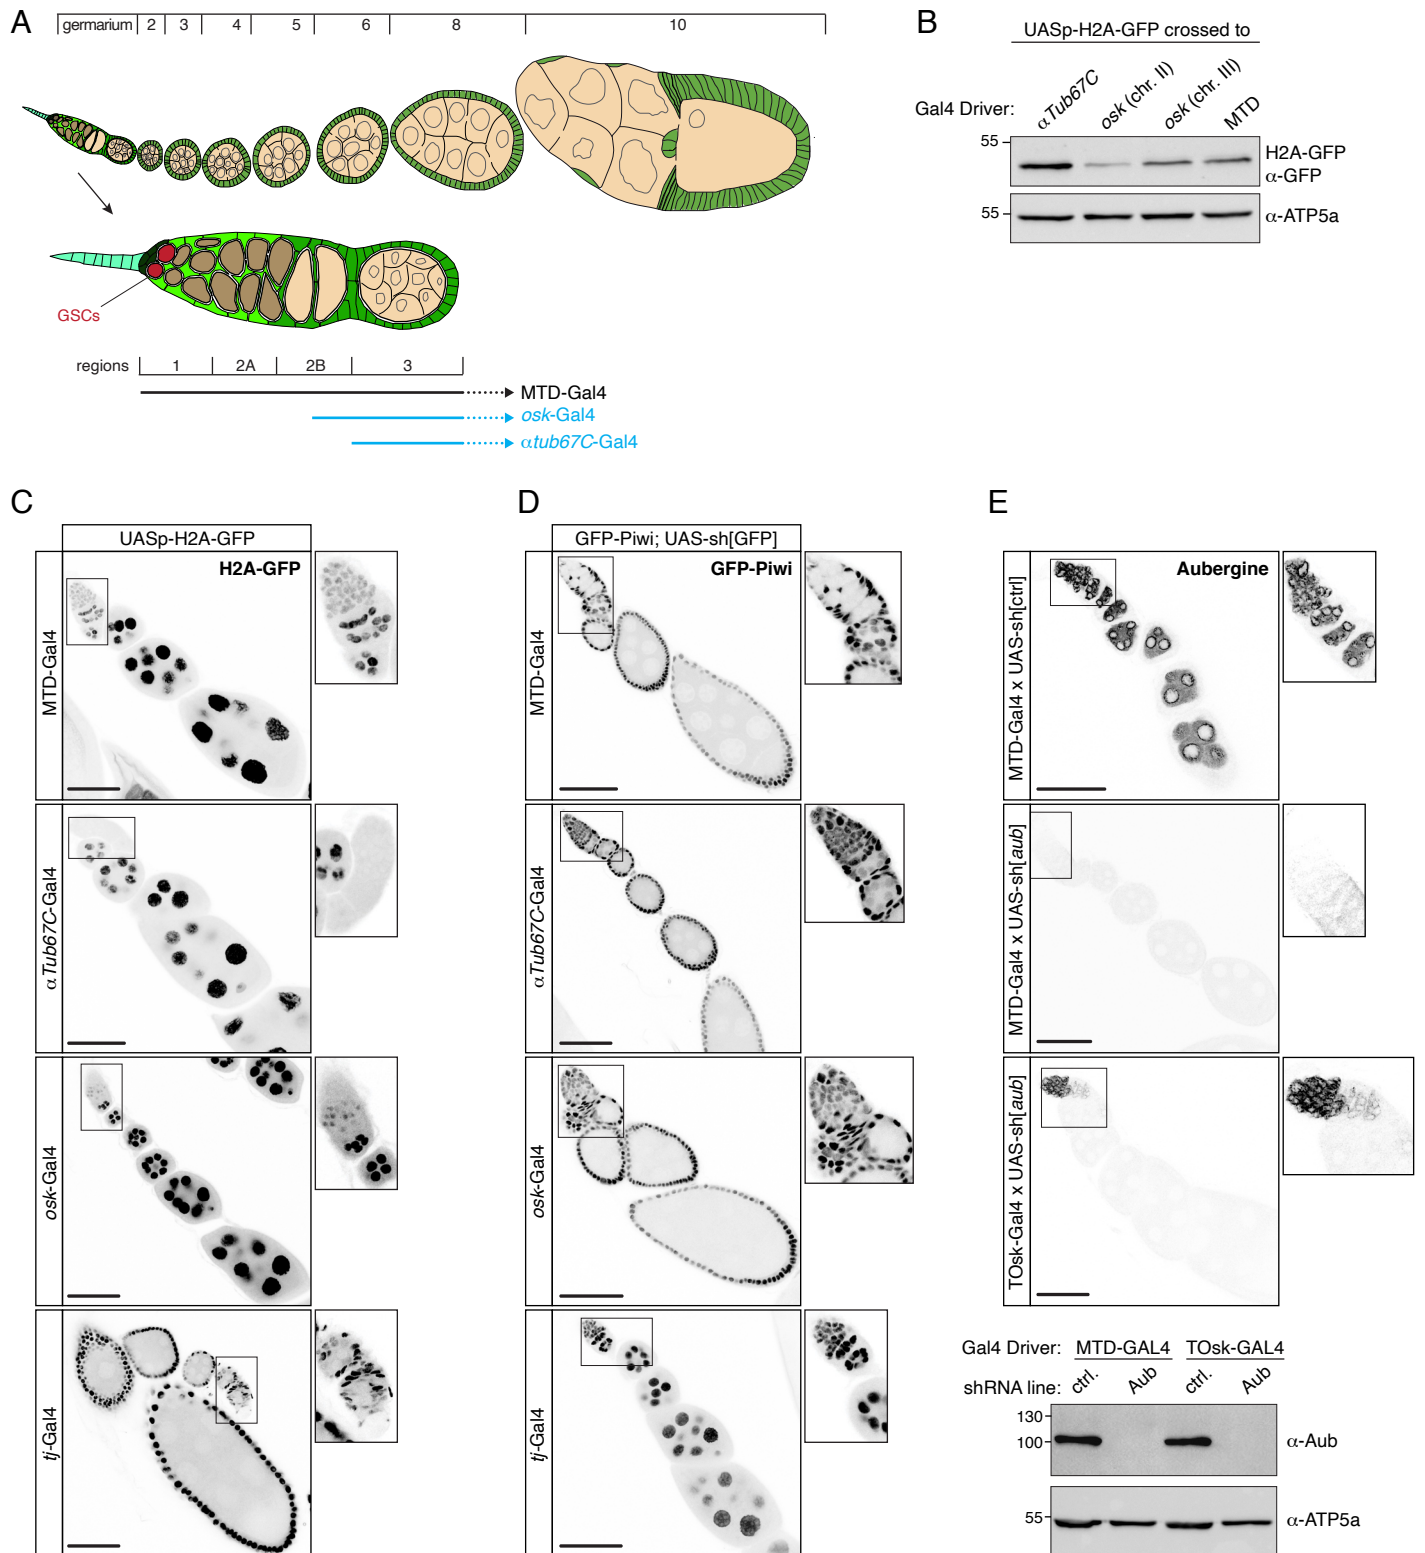

### Figure 3

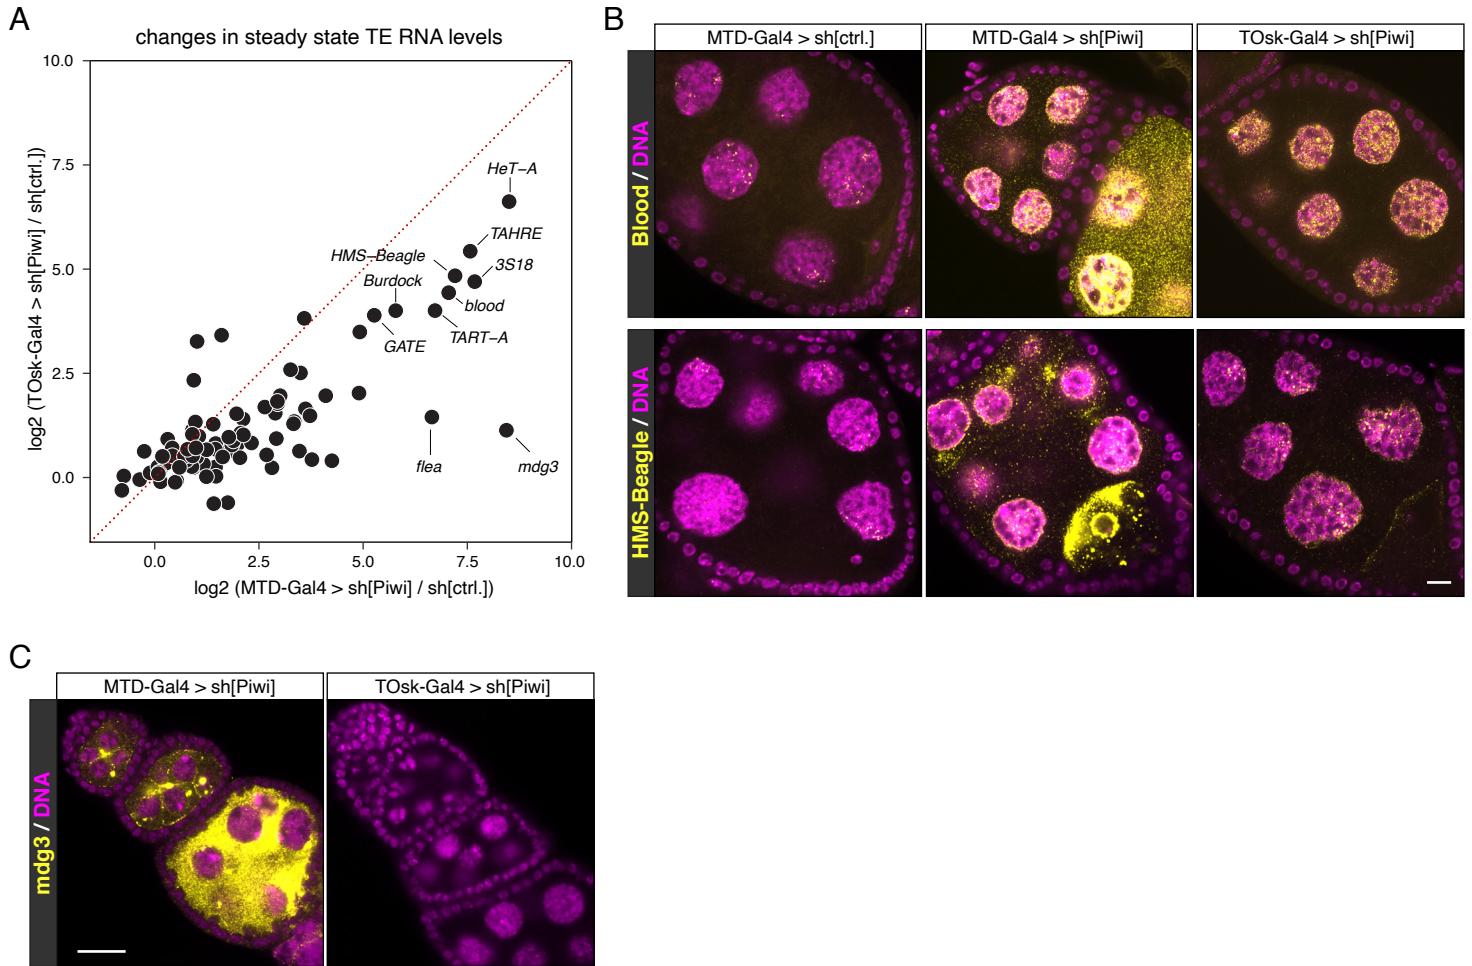



## Figure 4

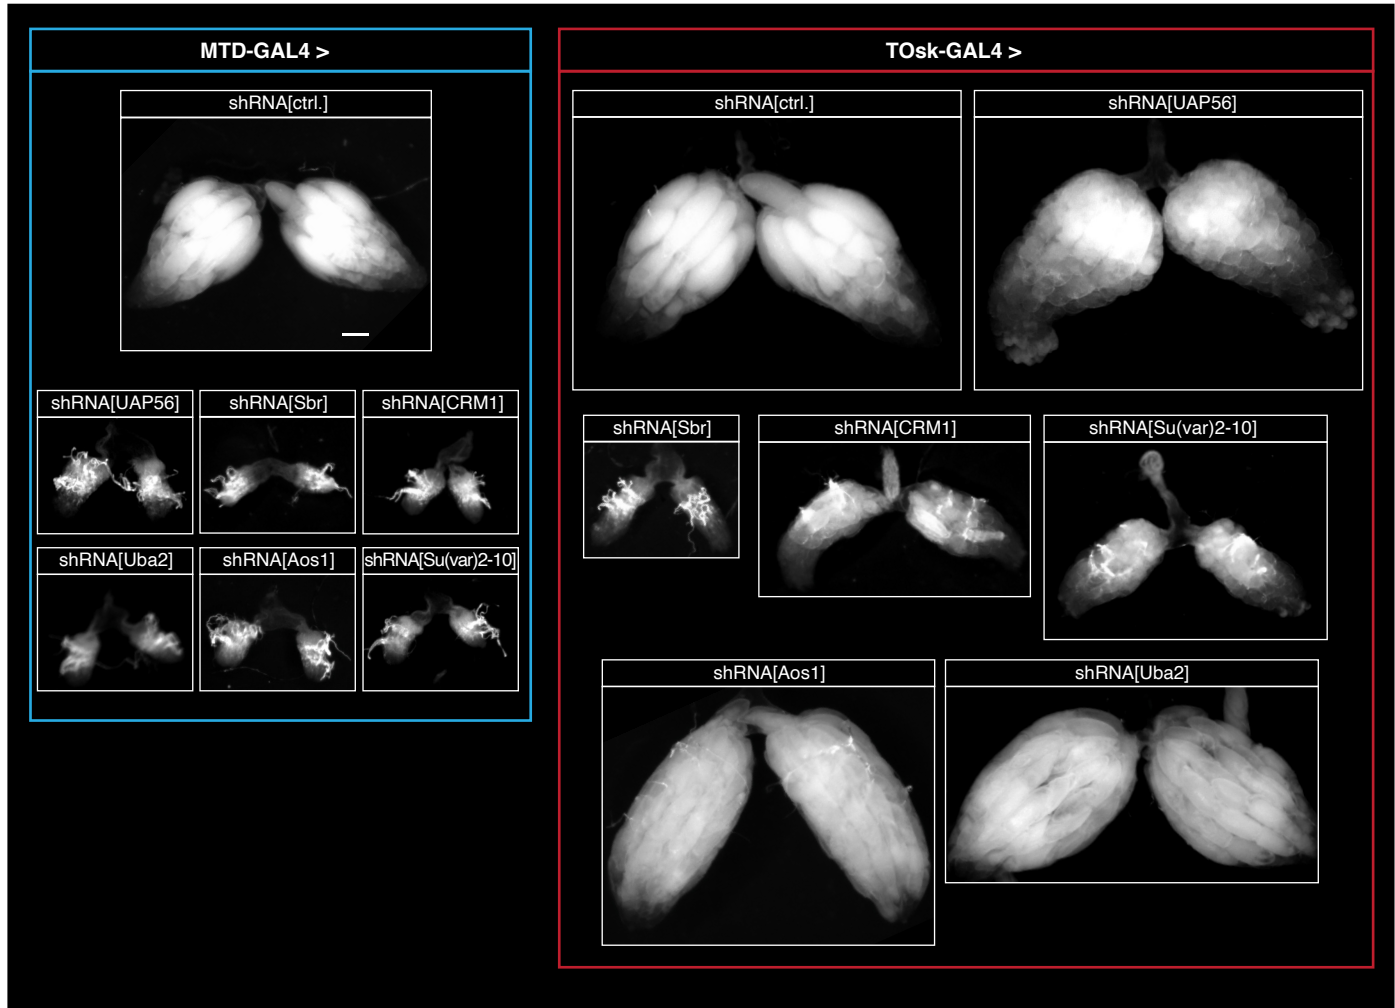

## Figure 5

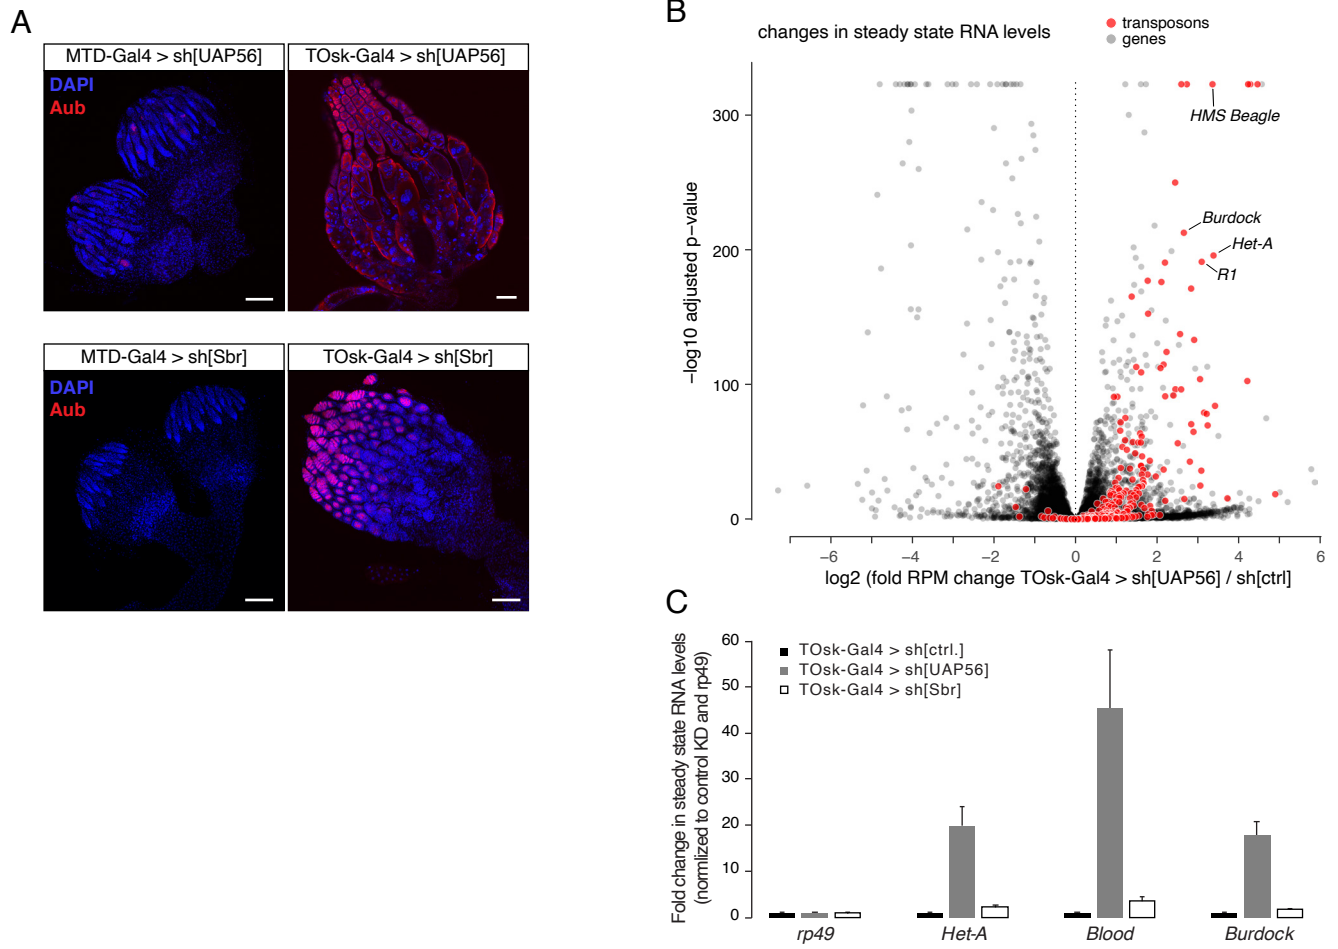

## Figure 6

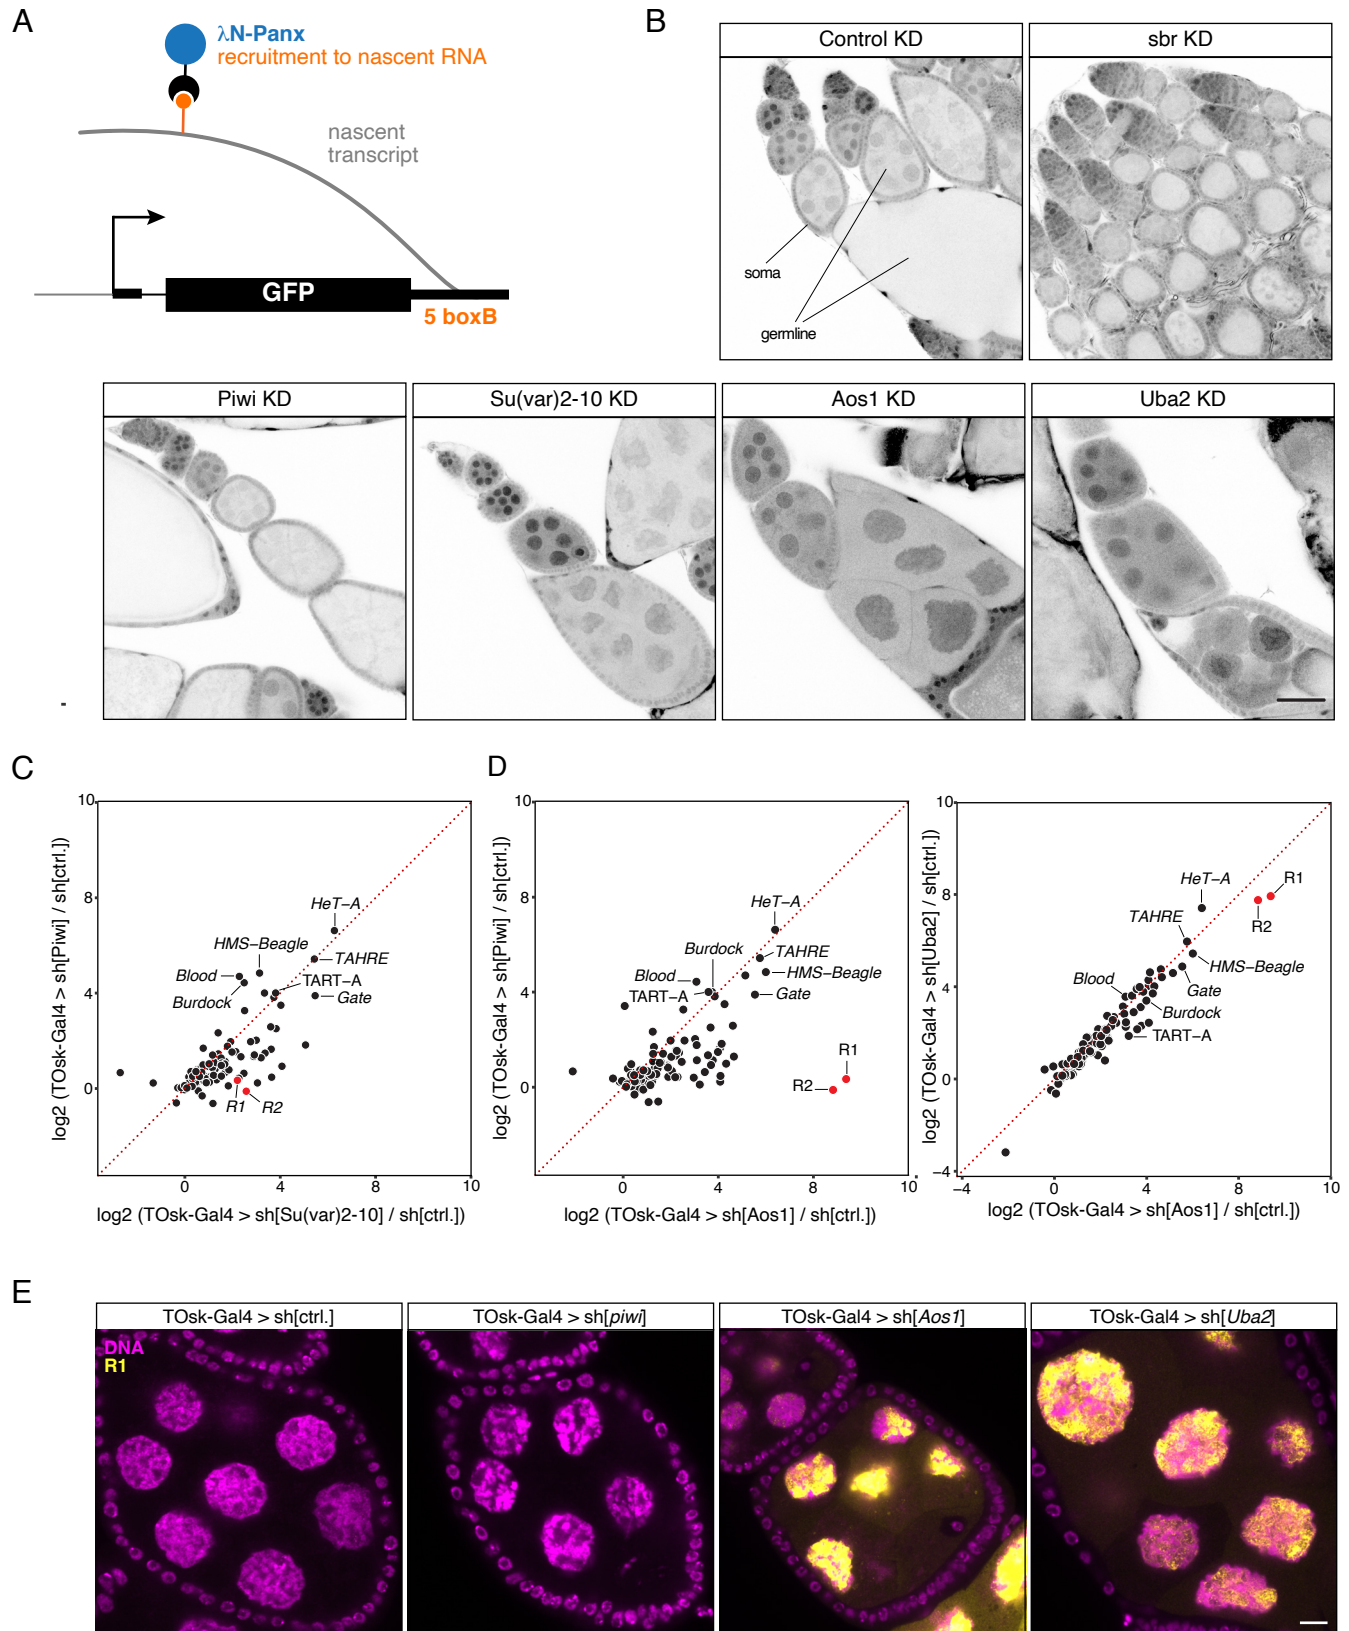

## Figure 7

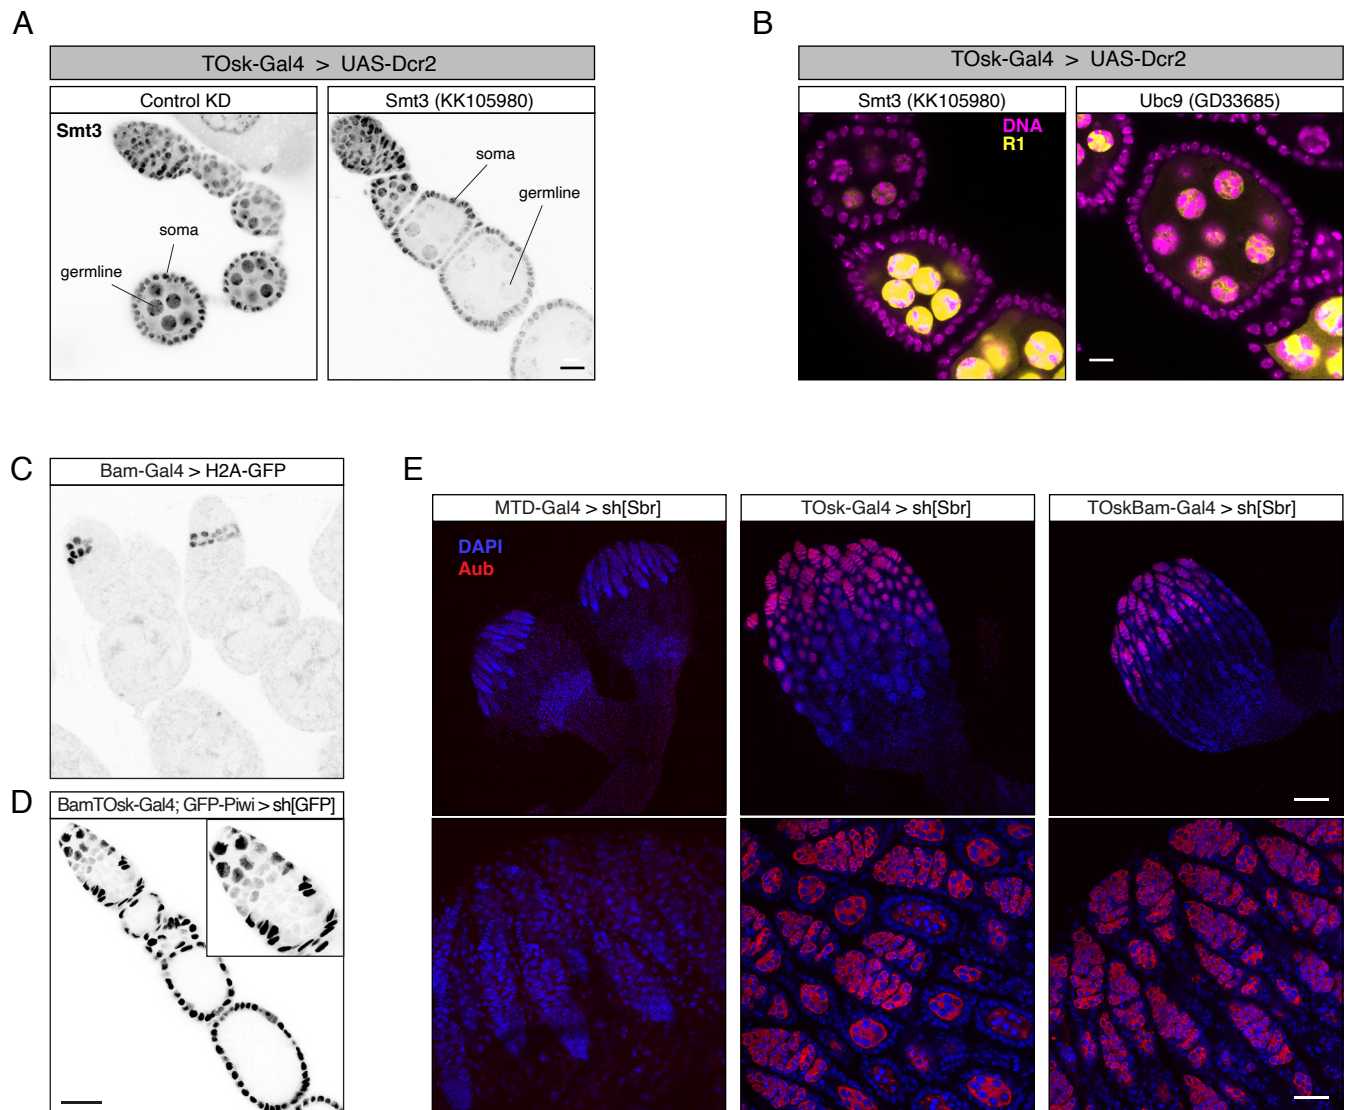

FIGURE S1

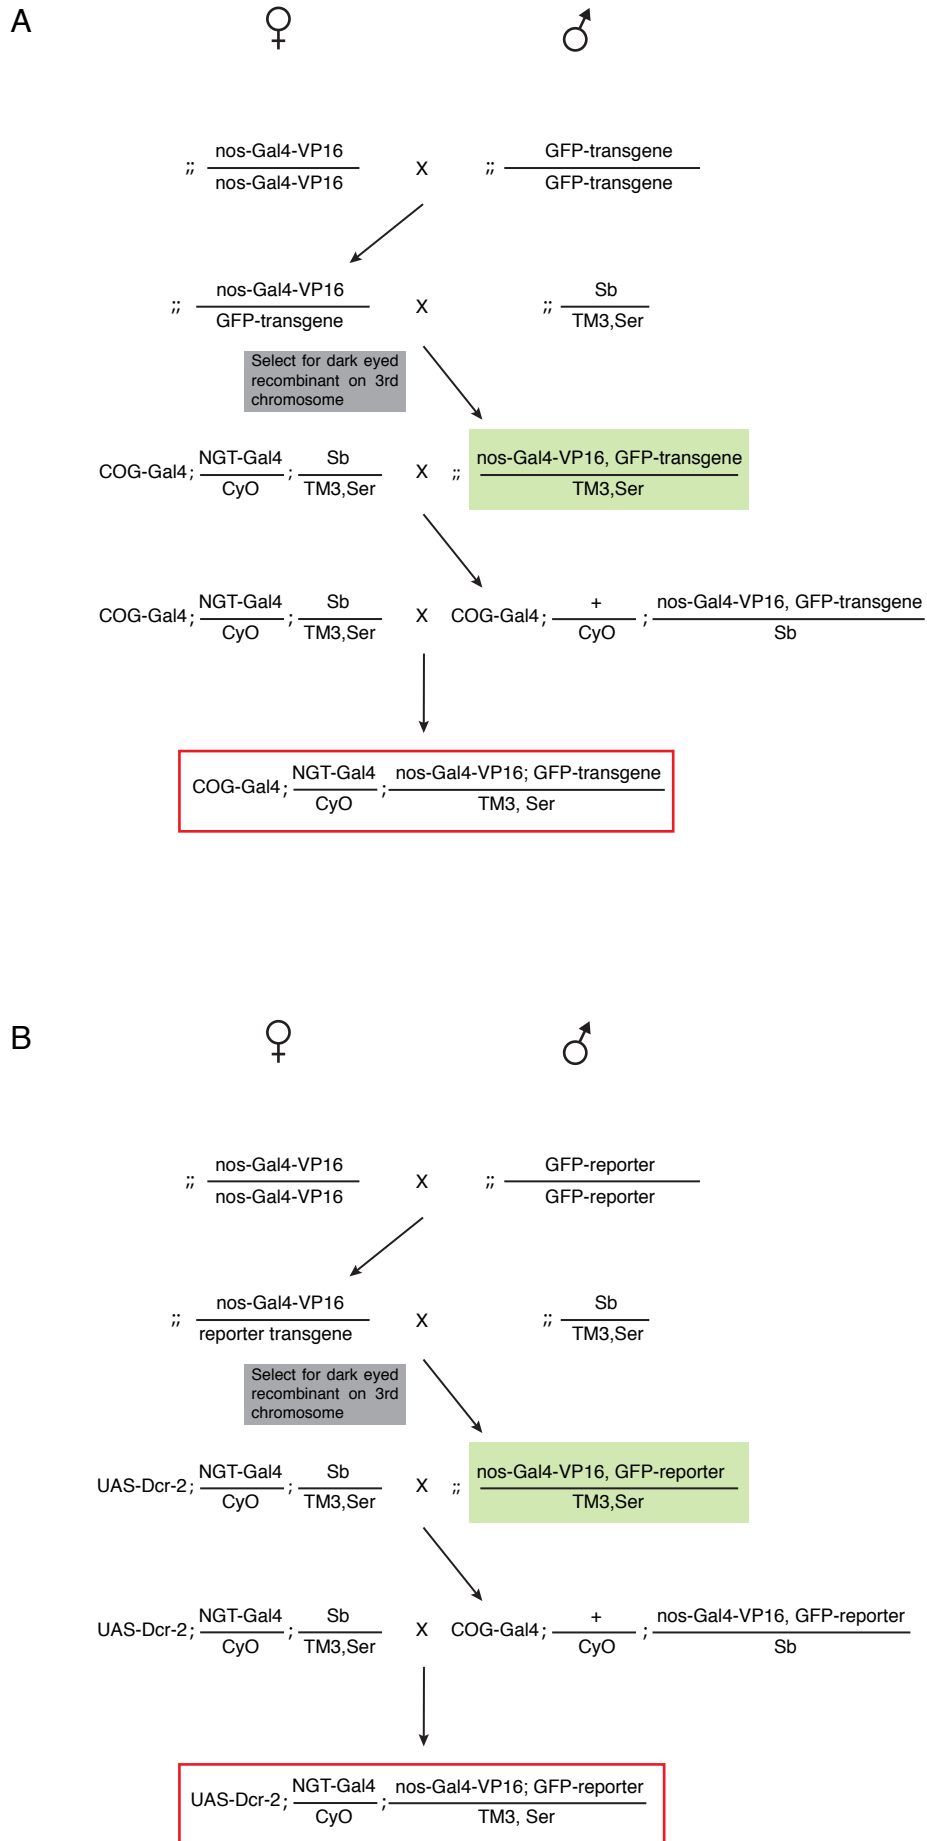

Source: https://www.biorxiv.org/content/10.1101/2021.06.29.450424v1.full.pdf
